# Supplementary material
Source: publisher figshare collection journal article supplement (https://acs.figshare.com/ndownloader/files/5874552)
Supplement: Supplementary file 1 [file 5874552]

# om010667+.cif

data_1b
_audit_creation_date        00-19-09
_audit_creation_method CRYSTALS_ver_12-03-99
#==========================================================================    
# Diffractometer details                                                       
#==========================================================================    
_diffrn_measurement_device_type                                                
;                                                                              
Enraf-nonius DIP2000                                                           
;                                                                              
_diffrn_radiation_monochromator      graphite                                  
_computing_data_collection                                                     
;                                                                              
DIP2000 software 'Xpress' (MAC Science, 1989)                                  
;                                                                              
_computing_data_reduction                                                      
;                                                                              
DIP2000 software 'DENZO' (Otwinowski & Minor, 1996)                            
;                                                                              
_computing_cell_refinement                                                     
;                                                                              
DIP2000 software 'DENZO' (Otwinowski & Minor, 1996)                            
;                                                                              
#==========================================================================    
# General computing                                                            
#==========================================================================    
_computing_structure_refinement                                                
;                                                                              
CRYSTALS Issue 10 (Watkin, Prout, Carruthers & Betteridge, 1996)               
;                                                                              
_computing_publication_material                                                
;                                                                              
CRYSTALS Issue 10 (Watkin, Prout, Carruthers & Betteridge, 1996)               
;                                                                              
_computing_structure_solution 'SIR92 (Giacovazzo et al, 1992)'                 
                                                                                
#==========================================================================    
                                                                                
_chemical_name_systematic       # IUPAC name, in full                          
;                                                                              
ruthenocenylmethylium 
tetra(3,5-bis(trifluoromethyl)phenyl)borate                                                                              
;                                                                              
_chemical_melting_point                    'not measured'                      
_refine_ls_matrix_type                      full                               
_atom_sites_solution_primary                direct                             
_atom_sites_solution_hydrogens 
difmap                               
_refine_ls_hydrogen_treatment 
refxyz                              
#****************************************************************************  
_cell_length_a 15.703(1)
_cell_angle_alpha 90
_cell_length_b 12.742(1)
_cell_angle_beta  97.974(4)
_cell_length_c 10.787(1)
_cell_angle_gamma 90
_cell_volume   2137.5
_symmetry_cell_setting 'Monoclinic '
_symmetry_space_group_name_H-M 'C 1 2 1 '
loop_
  _symmetry_equiv_pos_as_xyz
  'x,y,z'
  'x+1/2,y+1/2,z'
  '-x,y,-z'
  '-x+1/2,y+1/2,-z'
loop_
_atom_type_symbol
_atom_type_scat_dispersion_real
_atom_type_scat_dispersion_imag
_atom_type_scat_Cromer_Mann_a1
_atom_type_scat_Cromer_Mann_b1
_atom_type_scat_Cromer_Mann_a2
_atom_type_scat_Cromer_Mann_b2
_atom_type_scat_Cromer_Mann_a3
_atom_type_scat_Cromer_Mann_b3
_atom_type_scat_Cromer_Mann_a4
_atom_type_scat_Cromer_Mann_b4
_atom_type_scat_Cromer_Mann_c
_atom_type_scat_source 
  'C   '    0.0020    0.0020    2.3100   20.8439
     1.0200   10.2075    1.5886    0.5687    0.8650   51.6512    0.2156
'International_Tables_Vol_IV_Table_2.2B'
  'H   '    0.0000    0.0000    0.4930   10.5109
     0.3229   26.1257    0.1402    3.1424    0.0408   57.7997    0.0030
'International_Tables_Vol_IV_Table_2.2B'
  'B   '    0.0000    0.0010    2.0545   23.2185
     1.3326    1.0210    1.0979   60.3498    0.7068    0.1403   -0.1932
'International_Tables_Vol_IV_Table_2.2B'
  'F   '    0.0140    0.0100    3.5392   10.2825
     2.6412    4.2944    1.5170    0.2615    1.0243   26.1476    0.2776
'International_Tables_Vol_IV_Table_2.2B'
  'Ru  '   -1.4200    0.8360   19.2674    0.8085
    12.9182    8.4347    4.8634   24.7997    1.5676   94.2928    5.3787
'International_Tables_Vol_IV_Table_2.2B'
_chemical_formula_sum
' C43 H24 B1 F24 Ru1 '
_chemical_formula_moiety
' C43 H24 B1 F24 Ru1 '
_chemical_compound_source
;
?
;
_chemical_formula_weight   1108.5
_cell_measurement_reflns_used     6875
_cell_measurement_theta_min        0
_cell_measurement_theta_max       27
_cell_measurement_temperature    150
_cell_formula_units_Z 2
_exptl_crystal_description ' prism '
_exptl_crystal_colour ' pale green '
_exptl_crystal_size_min 0.20
_exptl_crystal_size_mid 0.20
_exptl_crystal_size_max 0.80
_exptl_crystal_density_diffrn 1.72
_exptl_crystal_density_meas 'not measured'
_exptl_crystal_F_000 1091.89
_exptl_absorpt_coefficient_mu 0.50
_exptl_absorpt_correction_type multi-scan
_exptl_absorpt_correction_T_min 0.67
_exptl_absorpt_correction_T_max 0.90
_diffrn_ambient_temperature        150
_diffrn_reflns_number 6875
_reflns_number_total 4149
_diffrn_reflns_av_R_equivalents 0.028
_diffrn_measured_fraction_theta_max 0.955
_reflns_number_gt 4122
_diffrn_reflns_theta_min 0.00
_diffrn_reflns_theta_max 26.57
_reflns_limit_h_min -19
_reflns_limit_h_max 19
_reflns_limit_k_min -15
_reflns_limit_k_max 15
_reflns_limit_l_min 0
_reflns_limit_l_max 12
_refine_diff_density_min -0.70
_refine_diff_density_max 1.48
_reflns_threshold_expression  >3.00\s(I)
_refine_ls_number_reflns 4122
_refine_ls_number_parameters 339
_refine_ls_R_factor_gt 0.0328
_refine_ls_wR_factor_ref 0.0398
_refine_ls_goodness_of_fit_ref 1.0545
_refine_ls_shift/su_max 0.025073
_refine_ls_abs_structure_Flack '0.0(1)'
_refine_ls_abs_structure_details 'Flack, 2025 Friedel-pairs'
_refine_ls_structure_factor_coef F
_refine_ls_weighting_scheme calc
_refine_ls_weighting_details
;
Chebychev polynomial with 3 parameters, Carruthers & Watkin , 1979,
  2.29    -.131     1.70   
;
_diffrn_radiation_type       'Mo K\a'
_diffrn_radiation_wavelength      0.71069
_diffrn_measurement_method \w

# Uequiv = arithmetic mean of Ui
# i.e. Ueqiv = (U1+U2+U3)/3

loop_
_atom_site_label
_atom_site_fract_x
_atom_site_fract_y
_atom_site_fract_z
_atom_site_U_iso_or_equiv
_atom_site_occupancy
_atom_site_adp_type
Ru1 0.5000 0.50584(5) 0.0000 0.0256 1.0000 Uani
F1 0.77349(15) 0.1757(2) 0.8269(2) 0.0592 1.0000 Uani
F2 0.7826(2) 0.3295(3) 0.9045(3) 0.0956 1.0000 Uani
F3 0.86386(14) 0.2841(2) 0.7741(4) 0.0812 1.0000 Uani
F4 0.7207(4) 0.6263(3) 0.5828(4) 0.1446 1.0000 Uani
F5 0.6153(4) 0.6021(3) 0.4474(5) 0.1570 1.0000 Uani
F6 0.7329(5) 0.5542(5) 0.4110(7) 0.1978 1.0000 Uani
F7 0.61143(19) 0.1967(3) 0.0093(3) 0.0964 1.0000 Uani
F8 0.6965(3) 0.0792(3) 0.0688(5) 0.1221 1.0000 Uani
F9 0.7081(3) 0.2210(5) 0.1588(4) 0.1425 1.0000 Uani
F10 0.35192(17) -0.0805(3) 0.2034(4) 0.0957 1.0000 Uani
F11 0.45002(19) -0.1499(2) 0.1138(3) 0.0625 1.0000 Uani
F12 0.4511(2) -0.1736(2) 0.3072(3) 0.0809 1.0000 Uani
C1 0.5263(3) 0.4801(3) 0.1933(4) 0.0528 1.0000 Uani
C2 0.4563(4) 0.4135(3) 0.1475(4) 0.0522 1.0000 Uani
C3 0.3881(3) 0.4778(3) 0.0966(5) 0.0608 1.0000 Uani
C4 0.4132(3) 0.5853(3) 0.1138(5) 0.0517 1.0000 Uani
C5 0.4969(3) 0.5869(4) 0.1756(4) 0.0534 1.0000 Uani
C6 0.6044(6) 0.4611(7) 0.1671(8) 0.0560 0.5000 Uani
C7 0.58421(17) 0.2931(2) 0.5541(3) 0.0270 1.0000 Uani
C8 0.64696(17) 0.2571(2) 0.6502(3) 0.0287 1.0000 Uani
C9 0.71887(18) 0.3167(2) 0.6954(3) 0.0314 1.0000 Uani
C10 0.7309(2) 0.4148(3) 0.6489(3) 0.0438 1.0000 Uani
C11 0.6702(3) 0.4535(3) 0.5549(4) 0.0487 1.0000 Uani
C12 0.5982(2) 0.3928(3) 0.5092(3) 0.0389 1.0000 Uani
C13 0.52223(16) 0.1471(2) 0.3839(3) 0.0249 1.0000 Uani
C14 0.47710(18) 0.0533(2) 0.3525(3) 0.0289 1.0000 Uani
C15 0.48812(17) -0.0047(4) 0.2465(3) 0.0317 1.0000 Uani
C16 0.54630(19) 0.0262(2) 0.1683(3) 0.0334 1.0000 Uani
C17 0.59202(18) 0.1180(2) 0.1976(3) 0.0316 1.0000 Uani
C18 0.58029(17) 0.1773(2) 0.3034(3) 0.0270 1.0000 Uani
C19 0.7828(2) 0.2767(3) 0.8006(4) 0.0403 1.0000 Uani
C20 0.6806(5) 0.5618(5) 0.5036(6) 0.1023 1.0000 Uani
C21 0.4355(2) -0.1019(3) 0.2180(4) 0.0438 1.0000 Uani
C22 0.6521(2) 0.1560(3) 0.1107(3) 0.0419 1.0000 Uani
B1 0.5000 0.2206(3) 0.5000 0.0241 1.0000 Uani
H11 0.5828(8) 0.4591(7) 0.214(4) 0.070(6) 1.0000 Uiso
H21 0.459(1) 0.3414(9) 0.138(3) 0.070(6) 1.0000 Uiso
H31 0.3364(15) 0.4546(7) 0.054(4) 0.070(6) 1.0000 Uiso
H41 0.3829(12) 0.6426(8) 0.079(3) 0.070(6) 1.0000 Uiso
H51 0.5310(9) 0.6457(8) 0.189(4) 0.070(6) 1.0000 Uiso
H61 0.6533(15) 0.516(2) 0.177(6) 0.070(6) 0.5000 Uiso
H62 0.626(3) 0.3873(18) 0.147(11) 0.070(6) 0.5000 Uiso
H81 0.6397 0.1863 0.6874 0.0345 1.0000 Uiso
H101 0.7824 0.4576 0.6823 0.0521 1.0000 Uiso
H121 0.5552 0.4226 0.4414 0.0455 1.0000 Uiso
H141 0.4357 0.0274 0.4081 0.0342 1.0000 Uiso
H161 0.5551 -0.0164 0.0932 0.0391 1.0000 Uiso
H181 0.6145 0.2430 0.3218 0.0318 1.0000 Uiso
loop_
_atom_site_aniso_label
_atom_site_aniso_U_11
_atom_site_aniso_U_22
_atom_site_aniso_U_33
_atom_site_aniso_U_23
_atom_site_aniso_U_13
_atom_site_aniso_U_12
Ru1 0.02955(14) 0.01922(12) 0.02865(16) 0.0000 0.00599(9) 0.0000
F1 0.0466(12) 0.0568(13) 0.0663(16) 0.0120(11) -0.0206(11) -0.007(1)
F2 0.088(2) 0.121(3) 0.0618(19) -0.0472(19) -0.0482(17) 0.060(2)
F3 0.024(1) 0.0767(19) 0.141(3) 0.0252(18) 0.0035(13) 0.007(1)
F4 0.212(5) 0.072(2) 0.114(3) 0.036(2) -0.104(4) -0.083(3)
F5 0.209(6) 0.067(2) 0.156(4) 0.066(3) -0.114(4) -0.076(3)
F6 0.258(8) 0.161(5) 0.193(7) 0.083(5) 0.096(6) -0.067(5)
F7 0.0594(17) 0.159(4) 0.072(2) 0.071(2) 0.0147(14) 0.0119(18)
F8 0.137(3) 0.091(2) 0.166(4) 0.046(3) 0.119(3) 0.052(2)
F9 0.139(4) 0.235(6) 0.066(3) -0.050(3) 0.058(2) -0.135(4)
F10 0.0388(13) 0.076(2) 0.171(4) -0.057(2) 0.0091(17) -0.0198(12)
F11 0.0847(17) 0.0493(13) 0.0524(15) -0.0241(11) 0.0053(12) -0.0176(12)
F12 0.139(3) 0.0465(14) 0.0546(17) -0.0011(11) 0.0042(16) -0.0385(16)
C1 0.073(2) 0.058(3) 0.0257(19) 0.0024(14) 0.0005(15) -0.0051(18)
C2 0.079(4) 0.040(2) 0.044(3) 0.0021(17) 0.030(2) -0.012(2)
C3 0.0460(19) 0.058(3) 0.086(3) -0.020(2) 0.037(2) -0.0221(17)
C4 0.046(2) 0.047(2) 0.068(3) -0.021(2) 0.028(2) -0.0052(18)
C5 0.071(3) 0.051(3) 0.039(2) -0.0239(19) 0.013(2) -0.020(2)
C6 0.068(5) 0.055(4) 0.039(5) -0.001(3) -0.011(4) 0.013(4)
C7 0.0296(13) 0.0290(13) 0.0222(14) -0.004(1) 0.003(1) -0.003(1)
C8 0.0226(12) 0.0306(13) 0.0331(16) -0.0069(11) 0.004(1) 0.001(1)
C9 0.0244(13) 0.0404(15) 0.0290(16) -0.0066(12) 0.0020(11) 0.0009(11)
C10 0.0452(18) 0.057(2) 0.0282(18) -0.0065(14) 0.0003(13) -0.0243(15)
C11 0.065(2) 0.044(2) 0.032(2) 0.0047(15) -0.0110(17) -0.0274(19)
C12 0.0498(19) 0.0362(16) 0.0276(17) 0.0020(13) -0.0053(13) -0.0191(14)
C13 0.0221(11) 0.0241(12) 0.0266(14) 0.0005(9) -0.003(1) 0.0029(9)
C14 0.0280(13) 0.0277(12) 0.0298(16) -0.0021(11) -0.001(1) 0.001(1)
C15 0.0325(11) 0.0271(19) 0.0325(13) -0.0036(15) -0.0065(9) 0.0041(14)
C16 0.0366(13) 0.034(2) 0.0267(14) -0.005(1) -0.004(1) 0.0087(11)
C17 0.0274(13) 0.0406(15) 0.0259(15) 0.0022(11) 0.000(1) 0.0079(11)
C18 0.0243(12) 0.0295(13) 0.0258(14) 0.002(1) -0.002(1) 0.004(1)
C19 0.0181(13) 0.0445(17) 0.054(2) -0.0103(15) -0.0099(13) 0.0058(12)
C20 0.140(6) 0.093(4) 0.056(3) 0.040(3) -0.050(4) -0.083(4)
C21 0.0468(18) 0.0378(16) 0.046(2) -0.0137(14) 0.0023(15) -0.0056(14)
C22 0.0401(17) 0.0517(19) 0.0337(18) 0.0019(14) 0.0039(13) 0.0071(14)
B1 0.0241(18) 0.0242(19) 0.023(2) 0.0000 -0.0007(14) 0.0000
_refine_ls_extinction_method
     'None'
loop_
  _geom_bond_atom_site_label_1
  _geom_bond_site_symmetry_1
  _geom_bond_atom_site_label_2
  _geom_bond_site_symmetry_2
  _geom_bond_distance
  _geom_bond_publ_flag
Ru1 . C1 . 2.094(4)    yes
Ru1 . C1 3_655 2.094(4)    yes
Ru1 . C2 . 2.166(4)    yes
Ru1 . C2 3_655 2.166(4)    yes
Ru1 . C3 . 2.194(4)    yes
Ru1 . C3 3_655 2.194(4)    yes
Ru1 . C4 . 2.203(4)    yes
Ru1 . C4 3_655 2.203(4)    yes
Ru1 . C5 . 2.164(4)    yes
Ru1 . C5 3_655 2.164(4)    yes
Ru1 . C6 . 2.333(8)    yes
Ru1 . C6 3_655 2.333(8)    yes
F1 . C19 . 1.330(5)    yes
F2 . C19 . 1.308(5)    yes
F3 . C19 . 1.346(4)    yes
F4 . C20 . 1.286(6)    yes
F5 . C20 . 1.229(9)    yes
F6 . C20 . 1.381(12)    yes
F7 . C22 . 1.296(5)    yes
F8 . C22 . 1.318(5)    yes
F9 . C22 . 1.265(5)    yes
F10 . C21 . 1.328(5)    yes
F11 . C21 . 1.327(5)    yes
F12 . C21 . 1.326(5)    yes
C1 . C2 . 1.421(6)    yes
C1 . C5 . 1.442(7)    yes
C1 . C6 . 1.319(11)    yes
C1 . H11 . 0.92(1)    no
C2 . C3 . 1.399(7)    yes
C2 . H21 . 0.93(1)    no
C3 . C4 . 1.430(6)    yes
C3 . H31 . 0.92(1)    no
C4 . C5 . 1.388(7)    yes
C4 . H41 . 0.92(1)    no
C5 . H51 . 0.92(1)    no
C6 . H11 . 0.65(4)    no
C6 . H61 . 1.03(1)    no
C6 . H62 . 1.03(1)    no
C7 . C8 . 1.405(4)    yes
C7 . C12 . 1.388(4)    yes
C7 . B1 . 1.652(3)    yes
C8 . C9 . 1.392(4)    yes
C8 . H81 . 1.000(3)    no
C9 . C10 . 1.369(5)    yes
C9 . C19 . 1.497(4)    yes
C10 . C11 . 1.382(6)    yes
C10 . H101 . 1.000(3)    no
C11 . C12 . 1.401(5)    yes
C11 . C20 . 1.504(6)    yes
C12 . H121 . 1.000(4)    no
C13 . C14 . 1.407(4)    yes
C13 . C18 . 1.397(4)    yes
C13 . B1 . 1.639(4)    yes
C14 . C15 . 1.392(5)    yes
C14 . H141 . 1.000(3)    no
C15 . C16 . 1.384(5)    yes
C15 . C21 . 1.497(5)    yes
C16 . C17 . 1.387(4)    yes
C16 . H161 . 1.000(3)    no
C17 . C18 . 1.401(4)    yes
C17 . C22 . 1.500(5)    yes
C18 . H181 . 1.000(3)    no
loop_
  _geom_angle_atom_site_label_1
  _geom_angle_site_symmetry_1
  _geom_angle_atom_site_label_2
  _geom_angle_site_symmetry_2
  _geom_angle_atom_site_label_3
  _geom_angle_site_symmetry_3
  _geom_angle
  _geom_angle_publ_flag
C1 . Ru1 . C1 3_655 162.0(2)    yes
C1 . Ru1 . C2 . 38.93(18)    yes
C1 3_655 Ru1 . C2 . 127.40(17)    yes
C1 . Ru1 . C2 3_655 127.40(17)    yes
C1 3_655 Ru1 . C2 3_655 38.93(18)    yes
C2 . Ru1 . C2 3_655 114.2(2)    yes
C1 . Ru1 . C3 . 63.99(19)    yes
C1 3_655 Ru1 . C3 . 112.79(18)    yes
C2 . Ru1 . C3 . 37.4(2)    yes
C2 3_655 Ru1 . C3 . 128.10(18)    yes
C1 . Ru1 . C3 3_655 112.79(18)    yes
C1 3_655 Ru1 . C3 3_655 63.99(19)    yes
C2 . Ru1 . C3 3_655 128.10(18)    yes
C2 3_655 Ru1 . C3 3_655 37.4(2)    yes
C3 . Ru1 . C3 3_655 161.2(2)    yes
C1 . Ru1 . C4 . 64.46(18)    yes
C1 3_655 Ru1 . C4 . 125.12(18)    yes
C2 . Ru1 . C4 . 63.68(17)    yes
C2 3_655 Ru1 . C4 . 160.51(16)    yes
C3 . Ru1 . C4 . 37.98(18)    yes
C1 . Ru1 . C4 3_655 125.12(18)    yes
C1 3_655 Ru1 . C4 3_655 64.46(18)    yes
C2 . Ru1 . C4 3_655 160.51(16)    yes
C2 3_655 Ru1 . C4 3_655 63.68(17)    yes
C3 . Ru1 . C4 3_655 159.73(15)    yes
C1 . Ru1 . C5 . 39.5(2)    yes
C1 3_655 Ru1 . C5 . 157.07(17)    yes
C2 . Ru1 . C5 . 64.43(16)    yes
C2 3_655 Ru1 . C5 . 161.87(17)    yes
C3 . Ru1 . C5 . 62.93(16)    yes
C1 . Ru1 . C5 3_655 157.07(17)    yes
C1 3_655 Ru1 . C5 3_655 39.5(2)    yes
C2 . Ru1 . C5 3_655 161.87(17)    yes
C2 3_655 Ru1 . C5 3_655 64.43(16)    yes
C3 . Ru1 . C5 3_655 127.64(19)    yes
C1 . Ru1 . C6 . 34.1(3)    yes
C1 3_655 Ru1 . C6 . 138.7(3)    yes
C2 . Ru1 . C6 . 63.9(3)    yes
C2 3_655 Ru1 . C6 . 100.0(3)    yes
C3 . Ru1 . C6 . 96.7(3)    yes
C1 . Ru1 . C6 3_655 138.7(3)    yes
C1 3_655 Ru1 . C6 3_655 34.1(3)    yes
C2 . Ru1 . C6 3_655 100.0(3)    yes
C2 3_655 Ru1 . C6 3_655 63.9(3)    yes
C3 . Ru1 . C6 3_655 78.7(3)    yes
C3 3_655 Ru1 . C4 . 159.73(15)    yes
C3 3_655 Ru1 . C4 3_655 37.98(18)    yes
C4 . Ru1 . C4 3_655 125.3(2)    yes
C3 3_655 Ru1 . C5 . 127.64(19)    yes
C4 . Ru1 . C5 . 37.06(18)    yes
C4 3_655 Ru1 . C5 . 111.06(17)    yes
C3 3_655 Ru1 . C5 3_655 62.93(16)    yes
C4 . Ru1 . C5 3_655 111.06(17)    yes
C4 3_655 Ru1 . C5 3_655 37.06(18)    yes
C5 . Ru1 . C5 3_655 123.0(3)    yes
C3 3_655 Ru1 . C6 . 78.7(3)    yes
C4 . Ru1 . C6 . 96.0(3)    yes
C4 3_655 Ru1 . C6 . 96.9(3)    yes
C5 . Ru1 . C6 . 62.6(3)    yes
C5 3_655 Ru1 . C6 . 134.0(3)    yes
C3 3_655 Ru1 . C6 3_655 96.7(3)    yes
C4 . Ru1 . C6 3_655 96.9(3)    yes
C4 3_655 Ru1 . C6 3_655 96.0(3)    yes
C5 . Ru1 . C6 3_655 134.0(3)    yes
C5 3_655 Ru1 . C6 3_655 62.6(3)    yes
C6 . Ru1 . C6 3_655 151.7(4)    yes
Ru1 . C1 . C2 . 73.2(3)    yes
Ru1 . C1 . C5 . 72.8(2)    yes
C2 . C1 . C5 . 107.5(4)    yes
Ru1 . C1 . C6 . 82.9(4)    yes
C2 . C1 . C6 . 120.9(5)    yes
C5 . C1 . C6 . 115.8(5)    yes
Ru1 . C1 . H11 . 109.7(25)    no
C2 . C1 . H11 . 125.6(5)    no
C5 . C1 . H11 . 125.7(5)    no
C6 . C1 . H11 . 26.9(25)    no
Ru1 . C2 . C1 . 67.8(2)    yes
Ru1 . C2 . C3 . 72.4(3)    yes
C1 . C2 . C3 . 107.5(3)    yes
Ru1 . C2 . H21 . 115.7(23)    no
C1 . C2 . H21 . 125.7(4)    no
C3 . C2 . H21 . 125.7(4)    no
Ru1 . C3 . C2 . 70.2(2)    yes
Ru1 . C3 . C4 . 71.4(2)    yes
C2 . C3 . C4 . 109.1(3)    yes
Ru1 . C3 . H31 . 121.7(34)    no
C2 . C3 . H31 . 125.4(4)    no
C4 . C3 . H31 . 125.4(4)    no
Ru1 . C4 . C3 . 70.7(2)    yes
Ru1 . C4 . C5 . 70.0(2)    yes
C3 . C4 . C5 . 107.6(4)    yes
Ru1 . C4 . H41 . 117.4(24)    no
C3 . C4 . H41 . 126.0(4)    no
C5 . C4 . H41 . 125.7(4)    no
Ru1 . C5 . C1 . 67.6(2)    yes
Ru1 . C5 . C4 . 73.0(2)    yes
C1 . C5 . C4 . 108.2(4)    yes
Ru1 . C5 . H51 . 116.3(25)    no
C1 . C5 . H51 . 125.4(4)    no
C4 . C5 . H51 . 125.4(4)    no
Ru1 . C6 . C1 . 63.0(4)    yes
Ru1 . C6 . H11 . 103.0(19)    no
C1 . C6 . H11 . 40.2(18)    no
Ru1 . C6 . H61 . 110.5(36)    no
C1 . C6 . H61 . 123.6(5)    no
H11 . C6 . H61 . 113.9(29)    no
Ru1 . C6 . H62 . 106.2(60)    no
C1 . C6 . H62 . 123.7(5)    no
H11 . C6 . H62 . 110.5(45)    no
H61 . C6 . H62 . 112.1(13)    no
C8 . C7 . C12 . 115.3(3)    yes
C8 . C7 . B1 . 121.6(2)    yes
C12 . C7 . B1 . 123.1(3)    yes
C7 . C8 . C9 . 122.1(3)    yes
C7 . C8 . H81 . 118.9(3)    no
C9 . C8 . H81 . 118.9(3)    no
C8 . C9 . C10 . 121.1(3)    yes
C8 . C9 . C19 . 120.4(3)    yes
C10 . C9 . C19 . 118.5(3)    yes
C9 . C10 . C11 . 118.5(3)    yes
C9 . C10 . H101 . 120.7(4)    no
C11 . C10 . H101 . 120.7(4)    no
C10 . C11 . C12 . 120.1(3)    yes
C10 . C11 . C20 . 119.9(4)    yes
C12 . C11 . C20 . 120.0(4)    yes
C7 . C12 . C11 . 122.8(3)    yes
C7 . C12 . H121 . 118.6(3)    no
C11 . C12 . H121 . 118.6(3)    no
C14 . C13 . C18 . 115.7(3)    yes
C14 . C13 . B1 . 121.1(2)    yes
C18 . C13 . B1 . 123.0(2)    yes
C13 . C14 . C15 . 122.2(3)    yes
C13 . C14 . H141 . 118.9(3)    no
C15 . C14 . H141 . 118.9(3)    no
C14 . C15 . C16 . 121.2(3)    yes
C14 . C15 . C21 . 118.7(3)    yes
C16 . C15 . C21 . 120.1(3)    yes
C15 . C16 . C17 . 117.7(3)    yes
C15 . C16 . H161 . 121.1(3)    no
C17 . C16 . H161 . 121.1(3)    no
C16 . C17 . C18 . 121.2(3)    yes
C16 . C17 . C22 . 118.7(3)    yes
C18 . C17 . C22 . 120.0(3)    yes
C13 . C18 . C17 . 121.9(3)    yes
C13 . C18 . H181 . 119.0(3)    no
C17 . C18 . H181 . 119.0(3)    no
F1 . C19 . F2 . 107.6(4)    yes
F1 . C19 . F3 . 104.4(3)    yes
F2 . C19 . F3 . 105.1(3)    yes
F1 . C19 . C9 . 114.2(3)    yes
F2 . C19 . C9 . 113.1(3)    yes
F3 . C19 . C9 . 111.7(4)    yes
F4 . C20 . F5 . 111.0(8)    yes
F4 . C20 . F6 . 103.8(6)    yes
F5 . C20 . F6 . 102.2(6)    yes
F4 . C20 . C11 . 114.2(4)    yes
F5 . C20 . C11 . 116.1(5)    yes
F6 . C20 . C11 . 107.9(7)    yes
F10 . C21 . F11 . 106.1(3)    yes
F10 . C21 . F12 . 108.0(4)    yes
F11 . C21 . F12 . 105.1(3)    yes
F10 . C21 . C15 . 111.3(3)    yes
F11 . C21 . C15 . 113.6(3)    yes
F12 . C21 . C15 . 112.3(3)    yes
F7 . C22 . F8 . 103.3(4)    yes
F7 . C22 . F9 . 108.5(4)    yes
F8 . C22 . F9 . 104.8(5)    yes
F7 . C22 . C17 . 112.2(3)    yes
F8 . C22 . C17 . 112.5(3)    yes
F9 . C22 . C17 . 114.6(3)    yes
C7 . B1 . C7 3_656 112.0(3)    yes
C7 . B1 . C13 . 110.14(13)    yes
C7 3_656 B1 . C13 . 107.11(13)    yes
C7 . B1 . C13 3_656 107.11(13)    yes
C7 3_656 B1 . C13 3_656 110.14(13)    yes
C13 . B1 . C13 3_656 110.4(3)    yes
C1 . H11 . C6 . 112.8(41)    no

#===END

data_1d
_audit_creation_date        01-24-04
_audit_creation_method CRYSTALS_ver_12-03-99
#==========================================================================    
# Diffractometer details                                                       
#==========================================================================    
_diffrn_measurement_device_type                                                
;                                                                              
Nonius KappaCCD                                                                
;                                                                              
_diffrn_radiation_monochromator      graphite                                  
_computing_data_collection                                                     
;                                                                              
KappaCCD software 'Collect' (Nonius, 2000)                                     
;                                                                              
_computing_data_reduction                                                      
;                                                                              
KappaCCD software 'DENZO' (Otwinowski & Minor, 1996)                           
;                                                                              
_computing_cell_refinement                                                     
;                                                                              
KappaCCD software 'DENZO' (Otwinowski & Minor, 1996)                           
;                                                                              
#==========================================================================    
# General computing                                                            
#==========================================================================    
_computing_structure_refinement                                                
;                                                                              
CRYSTALS (Watkin et al, 2001)                                                  
;                                                                              
_computing_publication_material                                                
;                                                                              
CRYSTALS (Watkin et al, 2001)                                                  
;                                                                              
_computing_structure_solution 'SIR92 (Giacovazzo et al, 1992)'                 
                                                                                
                                                                                
_chemical_name_systematic       # IUPAC name, in full                          
;                                                                              
ruthenocenylmethylium 
trifluoromethanesulfonate                                                                              
;                                                                              
_chemical_melting_point                    'not measured'                      
_refine_ls_matrix_type                      full                               
_atom_sites_solution_primary                direct                             
_atom_sites_solution_hydrogens              geom                               
_refine_ls_hydrogen_treatment               noref                              
#****************************************************************************  
_cell_length_a 16.2555(3)
_cell_angle_alpha 90
_cell_length_b 13.2704(3)
_cell_angle_beta  104.543(2)
_cell_length_c 18.7369(5)
_cell_angle_gamma 90
_cell_volume   3912.4
_symmetry_cell_setting 'Monoclinic '
_symmetry_space_group_name_H-M 'P 1 21/c 1 '
loop_
  _symmetry_equiv_pos_as_xyz
  'x,y,z'
  '-x,-y,-z'
  '-x,y+1/2,-z+1/2'
  'x,-y+1/2,z+1/2'
loop_
_atom_type_symbol
_atom_type_scat_dispersion_real
_atom_type_scat_dispersion_imag
_atom_type_scat_Cromer_Mann_a1
_atom_type_scat_Cromer_Mann_b1
_atom_type_scat_Cromer_Mann_a2
_atom_type_scat_Cromer_Mann_b2
_atom_type_scat_Cromer_Mann_a3
_atom_type_scat_Cromer_Mann_b3
_atom_type_scat_Cromer_Mann_a4
_atom_type_scat_Cromer_Mann_b4
_atom_type_scat_Cromer_Mann_c
_atom_type_scat_source 
  'C   '    0.0020    0.0020    2.3100   20.8439
     1.0200   10.2075    1.5886    0.5687    0.8650   51.6512    0.2156
'International_Tables_Vol_IV_Table_2.2B'
  'H   '    0.0000    0.0000    0.4930   10.5109
     0.3229   26.1257    0.1402    3.1424    0.0408   57.7997    0.0030
'International_Tables_Vol_IV_Table_2.2B'
  'F   '    0.0140    0.0100    3.5392   10.2825
     2.6412    4.2944    1.5170    0.2615    1.0243   26.1476    0.2776
'International_Tables_Vol_IV_Table_2.2B'
  'O   '    0.0080    0.0060    3.0485   13.2771
     2.2868    5.7011    1.5463    0.3239    0.8670   32.9089    0.2508
'International_Tables_Vol_IV_Table_2.2B'
  'S   '    0.1100    0.1240    6.9053    1.4679
     5.2034   22.2151    1.4379    0.2536    1.5863   56.1720    0.8669
'International_Tables_Vol_IV_Table_2.2B'
  'Ru  '   -1.4200    0.8360   19.2674    0.8085
    12.9182    8.4347    4.8634   24.7997    1.5676   94.2928    5.3787
'International_Tables_Vol_IV_Table_2.2B'
_chemical_formula_sum
' C12 H11 F3 O3 Ru1 S1 '
_chemical_formula_moiety
' C12 H11 F3 O3 Ru1 S1 '
_chemical_compound_source
;
?
;
_chemical_formula_weight  345.34
_cell_measurement_reflns_used    28639
_cell_measurement_theta_min        5
_cell_measurement_theta_max       28
_cell_measurement_temperature    150
_cell_formula_units_Z 12
_exptl_crystal_description ' fragment '
_exptl_crystal_colour ' pale yellow '
_exptl_crystal_size_min 0.10
_exptl_crystal_size_mid 0.10
_exptl_crystal_size_max 0.30
_exptl_crystal_density_diffrn 1.759
_exptl_crystal_density_meas 'not measured'
_exptl_crystal_F_000 2313.165
_exptl_absorpt_coefficient_mu 1.371
_diffrn_measurement_method \w
_exptl_absorpt_correction_type multi-scan
_exptl_absorpt_process_details
;
  Denzo/Scalepack (Otwinowski & Minor, 1996)
;
_exptl_absorpt_correction_T_min 0.66
_exptl_absorpt_correction_T_max 0.87
_diffrn_ambient_temperature        150
_diffrn_reflns_number 28639
_reflns_number_total 9253
_diffrn_reflns_av_R_equivalents 0.039
_diffrn_measured_fraction_theta_max 0.99
_reflns_number_gt 5483
_diffrn_reflns_theta_min 5.11
_diffrn_reflns_theta_max 27.48
_reflns_limit_h_min -21
_reflns_limit_h_max 20
_reflns_limit_k_min 0
_reflns_limit_k_max 17
_reflns_limit_l_min 0
_reflns_limit_l_max 24
_refine_diff_density_min -0.76
_refine_diff_density_max 1.23
_reflns_threshold_expression  >3.00\s(I)
_refine_ls_number_reflns 5483
_refine_ls_number_parameters 553
_refine_ls_R_factor_gt 0.0371
_refine_ls_wR_factor_ref 0.0494
_refine_ls_goodness_of_fit_ref 1.0248
_refine_ls_shift/su_max 0.001201
_refine_ls_structure_factor_coef F
_refine_ls_weighting_scheme calc
_refine_ls_weighting_details
;
Chebychev polynomial with 3 parameters, Carruthers & Watkin , 1979,
  3.05    0.606     2.47   
;
_diffrn_radiation_type       'Mo K\a'
_diffrn_radiation_wavelength      0.71073

# Uequiv = arithmetic mean of Ui
# i.e. Ueqiv = (U1+U2+U3)/3

loop_
_atom_site_label
_atom_site_fract_x
_atom_site_fract_y
_atom_site_fract_z
_atom_site_U_iso_or_equiv
_atom_site_occupancy
_atom_site_adp_type
Ru1 0.341991(19) 0.00731(2) 0.326789(16) 0.0181 1.0000 Uani
C1 0.4741(3) 0.0029(3) 0.3580(2) 0.0261 1.0000 Uani
C2 0.4500(3) 0.1069(3) 0.3676(3) 0.0304 1.0000 Uani
C3 0.4043(3) 0.1058(3) 0.4225(2) 0.0335 1.0000 Uani
C4 0.3999(3) 0.0051(3) 0.4483(2) 0.0312 1.0000 Uani
C5 0.4447(3) -0.0590(3) 0.4111(2) 0.0270 1.0000 Uani
C6 0.4577(3) -0.0329(4) 0.2853(3) 0.0354 1.0000 Uani
C7 0.2067(3) 0.0463(4) 0.3040(3) 0.0383 1.0000 Uani
C8 0.2160(3) -0.0595(4) 0.3098(3) 0.0439 1.0000 Uani
C9 0.2528(3) -0.0936(3) 0.2535(3) 0.0360 1.0000 Uani
C10 0.2669(3) -0.0079(4) 0.2123(2) 0.0332 1.0000 Uani
C11 0.2372(3) 0.0784(3) 0.2432(3) 0.0307 1.0000 Uani
Ru2 0.32475(2) 0.50497(2) 0.327575(17) 0.0211 1.0000 Uani
C12 0.2581(5) 0.5817(5) 0.2343(3) 0.0653 1.0000 Uani
C13 0.3375(3) 0.6351(4) 0.2618(3) 0.0443 1.0000 Uani
C14 0.3324(4) 0.6721(4) 0.3335(4) 0.0643 1.0000 Uani
C15 0.2567(5) 0.6449(4) 0.3481(4) 0.0612 1.0000 Uani
C16 0.2087(3) 0.5888(4) 0.2844(4) 0.0490 1.0000 Uani
C17 0.2590(7) 0.4956(6) 0.2049(4) 0.0955 1.0000 Uani
C18 0.3900(6) 0.4464(6) 0.4342(3) 0.0778 1.0000 Uani
C19 0.3139(5) 0.3814(7) 0.4008(5) 0.0854 1.0000 Uani
C20 0.3266(4) 0.3418(5) 0.3389(5) 0.0771 1.0000 Uani
C21 0.4008(4) 0.3693(4) 0.3288(3) 0.0534 1.0000 Uani
C22 0.4431(3) 0.4325(4) 0.3848(3) 0.0410 1.0000 Uani
Ru3 0.0000 0.0000 0.0000 0.0281 1.0000 Uani
C23 0.1340(3) -0.0130(6) 0.0206(4) 0.0624 1.0000 Uani
C24 0.1134(4) 0.0927(5) 0.0279(4) 0.0575 1.0000 Uani
C25 0.0773(4) 0.0968(4) 0.0862(3) 0.0452 1.0000 Uani
C26 0.0714(4) -0.0003(4) 0.1169(3) 0.0454 1.0000 Uani
C27 0.1091(4) -0.0691(4) 0.0776(3) 0.0495 1.0000 Uani
C28 0.1174(7) -0.038(1) -0.0514(6) 0.0507 0.5000 Uani
Ru4 0.0000 0.5000 0.0000 0.0208 1.0000 Uani
C29 -0.0550(6) 0.5715(6) 0.0775(6) 0.0916 1.0000 Uani
C30 -0.1164(4) 0.5748(6) 0.0055(6) 0.0976 1.0000 Uani
C31 -0.0786(5) 0.6320(5) -0.0391(6) 0.0906 1.0000 Uani
C32 0.0024(4) 0.6658(4) 0.0018(4) 0.0564 1.0000 Uani
C33 0.0173(4) 0.6297(4) 0.0746(3) 0.0430 1.0000 Uani
C34 -0.0599(9) 0.495(1) 0.0960(6) 0.0597 0.5000 Uani
O1 0.1294(2) 0.2955(3) 0.2223(2) 0.0405 1.0000 Uani
O2 0.0507(2) 0.4243(2) 0.2675(2) 0.0430 1.0000 Uani
O3 0.1141(2) 0.2866(3) 0.3475(2) 0.0560 1.0000 Uani
S1 0.08049(7) 0.32272(8) 0.27340(6) 0.0285 1.0000 Uani
C35 -0.0167(3) 0.2494(3) 0.2411(3) 0.0321 1.0000 Uani
F1 -0.07269(18) 0.2686(2) 0.28033(17) 0.0412 1.0000 Uani
F2 -0.0007(2) 0.1514(2) 0.24516(19) 0.0483 1.0000 Uani
F3 -0.0552(2) 0.2711(2) 0.17047(16) 0.0460 1.0000 Uani
O4 0.2082(2) 0.7203(3) 0.10040(19) 0.0349 1.0000 Uani
O5 0.2072(3) 0.7163(3) -0.02891(19) 0.0503 1.0000 Uani
O6 0.2879(3) 0.5927(3) 0.0550(2) 0.0546 1.0000 Uani
S2 0.25126(7) 0.69102(8) 0.04572(6) 0.0276 1.0000 Uani
C36 0.3434(3) 0.7738(4) 0.0639(3) 0.0311 1.0000 Uani
F4 0.3945(2) 0.7544(2) 0.0200(2) 0.0530 1.0000 Uani
F5 0.3901(2) 0.7668(3) 0.13307(18) 0.0585 1.0000 Uani
F6 0.3200(2) 0.8702(2) 0.05312(19) 0.0492 1.0000 Uani
O7 0.4691(2) 0.2142(2) 0.06876(18) 0.0328 1.0000 Uani
O8 0.4591(2) 0.2215(3) 0.19629(18) 0.0397 1.0000 Uani
O9 0.3852(2) 0.0904(2) 0.1152(2) 0.0374 1.0000 Uani
S3 0.42068(7) 0.19006(7) 0.12138(6) 0.0235 1.0000 Uani
C37 0.3288(3) 0.2717(4) 0.0936(2) 0.0264 1.0000 Uani
F7 0.2766(2) 0.2652(2) 0.13809(18) 0.0479 1.0000 Uani
F8 0.2822(2) 0.2502(2) 0.02564(17) 0.0486 1.0000 Uani
F9 0.3514(2) 0.3680(2) 0.09273(17) 0.0427 1.0000 Uani
H21 0.4633 0.1673 0.3405 0.0343 1.0000 Uiso
H31 0.3790 0.1663 0.4407 0.0387 1.0000 Uiso
H41 0.3701 -0.0165 0.4864 0.0364 1.0000 Uiso
H51 0.4544 -0.1330 0.4195 0.0298 1.0000 Uiso
H61 0.4499 -0.1067 0.2751 0.0435 1.0000 Uiso
H62 0.4538 0.0155 0.2436 0.0435 1.0000 Uiso
H71 0.1828 0.0907 0.3369 0.0454 1.0000 Uiso
H81 0.1994 -0.1030 0.3475 0.0507 1.0000 Uiso
H91 0.2665 -0.1651 0.2441 0.0392 1.0000 Uiso
H101 0.2930 -0.0084 0.1693 0.0382 1.0000 Uiso
H111 0.2377 0.1492 0.2251 0.0340 1.0000 Uiso
H131 0.3849 0.6444 0.2371 0.0513 1.0000 Uiso
H141 0.3779 0.7120 0.3676 0.0735 1.0000 Uiso
H151 0.2382 0.6606 0.3939 0.0763 1.0000 Uiso
H161 0.1503 0.5604 0.2779 0.0560 1.0000 Uiso
H171 0.3072 0.4763 0.1835 0.1097 1.0000 Uiso
H172 0.2114 0.4471 0.2032 0.1097 1.0000 Uiso
H181 0.4006 0.4887 0.4798 0.0914 1.0000 Uiso
H191 0.2634 0.3701 0.4211 0.1083 1.0000 Uiso
H201 0.2852 0.2970 0.3047 0.0878 1.0000 Uiso
H211 0.4234 0.3474 0.2863 0.0613 1.0000 Uiso
H221 0.5005 0.4630 0.3898 0.0454 1.0000 Uiso
H241 0.1236 0.1502 -0.0033 0.0661 1.0000 Uiso
H251 0.0574 0.1604 0.1051 0.0484 1.0000 Uiso
H261 0.0454 -0.0165 0.1585 0.0512 1.0000 Uiso
H271 0.1171 -0.1430 0.0873 0.0527 1.0000 Uiso
H281 0.1147 0.0161 -0.0893 0.0643 0.5000 Uiso
H282 0.1079 -0.1097 -0.0669 0.0643 0.5000 Uiso
H301 -0.1737 0.5424 -0.0085 0.1184 1.0000 Uiso
H311 -0.1044 0.6473 -0.0923 0.0984 1.0000 Uiso
H321 0.0424 0.7084 -0.0178 0.0631 1.0000 Uiso
H331 0.0685 0.6425 0.1160 0.0525 1.0000 Uiso
H341 -0.0122 0.4644 0.1344 0.0787 0.5000 Uiso
H342 -0.1122 0.4541 0.0746 0.0787 0.5000 Uiso
loop_
_atom_site_aniso_label
_atom_site_aniso_U_11
_atom_site_aniso_U_22
_atom_site_aniso_U_33
_atom_site_aniso_U_23
_atom_site_aniso_U_13
_atom_site_aniso_U_12
Ru1 0.01723(17) 0.01772(17) 0.01871(17) 0.00360(11) 0.00321(12) 0.00097(12)
C1 0.0143(19) 0.029(2) 0.032(2) 0.0022(17) 0.0008(15) -0.0008(16)
C2 0.017(2) 0.029(2) 0.040(3) 0.0077(18) -0.0028(18) -0.0073(16)
C3 0.041(3) 0.029(2) 0.027(2) -0.0064(17) 0.002(2) -0.0000(19)
C4 0.039(3) 0.036(2) 0.0161(19) 0.0027(17) 0.0020(16) 0.003(2)
C5 0.025(2) 0.027(2) 0.022(2) 0.0008(16) -0.0060(16) -0.0006(17)
C6 0.027(2) 0.044(3) 0.039(3) 0.000(2) 0.0128(19) 0.0086(19)
C7 0.016(2) 0.053(3) 0.044(3) 0.007(2) 0.0049(19) 0.009(2)
C8 0.025(3) 0.052(3) 0.050(3) 0.020(2) 0.000(2) -0.014(2)
C9 0.032(3) 0.023(2) 0.044(3) -0.0010(18) -0.010(2) -0.0060(18)
C10 0.029(2) 0.049(3) 0.0179(19) 0.0032(19) -0.0023(16) 0.004(2)
C11 0.025(2) 0.027(2) 0.033(2) 0.0066(17) -0.0058(18) -0.0008(17)
Ru2 0.02162(18) 0.01786(18) 0.02339(18) 0.00537(12) 0.00509(12) 0.00190(12)
C12 0.101(6) 0.050(4) 0.030(3) 0.014(3) -0.010(3) 0.007(3)
C13 0.037(3) 0.035(3) 0.056(3) 0.030(2) 0.003(2) -0.007(2)
C14 0.068(5) 0.017(3) 0.099(6) -0.002(3) 0.004(4) 0.011(2)
C15 0.080(5) 0.038(3) 0.073(4) -0.001(3) 0.033(4) 0.015(3)
C16 0.029(3) 0.039(3) 0.072(4) 0.034(3) -0.001(3) 0.009(2)
C17 0.17(1) 0.074(5) 0.029(3) 0.006(3) 0.002(4) -0.006(5)
C18 0.110(5) 0.098(5) 0.021(3) 0.021(3) 0.007(3) 0.052(4)
C19 0.047(4) 0.109(6) 0.115(6) 0.100(5) 0.047(3) 0.044(3)
C20 0.048(4) 0.029(3) 0.142(8) 0.033(4) 0.002(5) -0.001(3)
C21 0.056(4) 0.035(3) 0.062(4) 0.003(2) 0.002(3) 0.021(3)
C22 0.026(3) 0.032(2) 0.056(3) 0.021(2) -0.0075(19) 0.0017(19)
Ru3 0.0260(3) 0.0193(2) 0.0306(3) -0.0003(2) -0.00866(19) 0.0027(2)
C23 0.016(2) 0.114(6) 0.055(3) -0.007(4) 0.004(2) 0.013(3)
C24 0.021(3) 0.061(4) 0.084(5) 0.010(3) -0.001(3) -0.006(2)
C25 0.043(3) 0.027(2) 0.051(3) -0.007(2) -0.015(3) -0.003(2)
C26 0.048(3) 0.051(3) 0.029(3) 0.006(2) -0.006(2) 0.009(2)
C27 0.038(3) 0.042(3) 0.052(3) -0.006(2) -0.020(2) 0.015(2)
C28 0.045(7) 0.067(7) 0.049(7) 0.002(5) 0.028(5) 0.007(5)
Ru4 0.0254(3) 0.0175(2) 0.0213(2) -0.00185(18) 0.00944(18) 0.00030(18)
C29 0.098(6) 0.054(4) 0.161(8) -0.067(5) 0.105(7) -0.038(4)
C30 0.029(4) 0.075(5) 0.19(1) -0.100(6) 0.034(5) -0.012(3)
C31 0.046(4) 0.043(4) 0.157(8) -0.034(4) -0.023(5) 0.020(3)
C32 0.054(4) 0.018(3) 0.086(5) -0.009(2) -0.004(3) 0.009(2)
C33 0.042(3) 0.034(3) 0.055(3) -0.024(2) 0.017(2) -0.001(2)
C34 0.09(1) 0.063(8) 0.045(6) 0.002(6) 0.049(7) 0.023(7)
O1 0.0280(18) 0.0415(19) 0.055(2) 0.0005(16) 0.0166(16) 0.0007(14)
O2 0.041(2) 0.0275(17) 0.063(2) -0.0066(15) 0.0178(18) -0.0053(14)
O3 0.042(2) 0.076(3) 0.038(2) 0.0179(19) -0.0126(17) -0.018(2)
S1 0.0263(6) 0.0262(5) 0.0322(6) 0.0025(4) 0.0058(4) -0.0057(4)
C35 0.026(3) 0.027(3) 0.042(3) 0.0026(17) 0.008(2) -0.0000(16)
F1 0.0284(16) 0.0485(16) 0.0496(18) 0.0049(13) 0.0151(13) -0.0039(13)
F2 0.0443(19) 0.0257(14) 0.072(2) -0.0004(13) 0.0095(16) -0.0059(12)
F3 0.0377(17) 0.0617(18) 0.0312(16) 0.0047(13) -0.0053(12) -0.0038(15)
O4 0.0326(18) 0.0326(16) 0.0443(19) 0.0064(14) 0.0186(15) 0.0067(14)
O5 0.053(2) 0.061(2) 0.0314(19) 0.0070(17) 0.0011(16) -0.022(2)
O6 0.075(3) 0.0237(18) 0.082(3) 0.0073(17) 0.050(2) 0.0110(17)
S2 0.0318(6) 0.0245(5) 0.0286(5) 0.0042(4) 0.0117(4) -0.0001(4)
C36 0.029(3) 0.034(2) 0.033(3) 0.012(2) 0.012(2) 0.002(2)
F4 0.043(2) 0.069(2) 0.058(2) 0.0054(15) 0.0329(17) -0.0020(14)
F5 0.0400(19) 0.091(3) 0.0377(18) 0.0172(16) -0.0034(14) -0.0104(17)
F6 0.0461(19) 0.0299(16) 0.071(2) 0.0007(14) 0.0125(16) -0.0079(13)
O7 0.0306(17) 0.0333(17) 0.0397(18) -0.0035(13) 0.0184(14) -0.0029(14)
O8 0.050(2) 0.0408(18) 0.0259(17) -0.0053(14) 0.0042(15) 0.0064(17)
O9 0.042(2) 0.0210(15) 0.054(2) -0.0001(13) 0.0203(16) -0.0021(13)
S3 0.0260(5) 0.0203(4) 0.0255(5) -0.0010(4) 0.0091(4) 0.0005(4)
C37 0.030(2) 0.0257(19) 0.025(2) -0.0022(17) 0.0106(18) -0.0026(18)
F7 0.0423(18) 0.0547(18) 0.058(2) 0.0090(14) 0.0343(16) 0.0125(14)
F8 0.0355(19) 0.068(2) 0.0368(17) -0.0109(13) -0.0021(14) 0.0121(13)
F9 0.0491(19) 0.0240(14) 0.0569(19) 0.0044(12) 0.0168(14) 0.0081(12)
_refine_ls_extinction_method
     'None'
loop_
  _geom_bond_atom_site_label_1
  _geom_bond_site_symmetry_1
  _geom_bond_atom_site_label_2
  _geom_bond_site_symmetry_2
  _geom_bond_distance
  _geom_bond_publ_flag
Ru1 . C1 . 2.080(4)    yes
Ru1 . C2 . 2.177(4)    yes
Ru1 . C3 . 2.245(4)    yes
Ru1 . C4 . 2.235(4)    yes
Ru1 . C5 . 2.175(4)    yes
Ru1 . C6 . 2.272(4)    yes
Ru1 . C7 . 2.194(5)    yes
Ru1 . C8 . 2.180(5)    yes
Ru1 . C9 . 2.187(4)    yes
Ru1 . C10 . 2.195(4)    yes
Ru1 . C11 . 2.215(4)    yes
C1 . C2 . 1.458(6)    yes
C1 . C5 . 1.459(6)    yes
C1 . C6 . 1.405(6)    yes
C2 . C3 . 1.413(7)    yes
C2 . H21 . 1.000(4)    no
C3 . C4 . 1.429(6)    yes
C3 . H31 . 1.000(5)    no
C4 . C5 . 1.412(6)    yes
C4 . H41 . 1.000(5)    no
C5 . H51 . 1.000(4)    no
C6 . H61 . 1.000(5)    no
C6 . H62 . 1.000(5)    no
C7 . C8 . 1.414(8)    yes
C7 . C11 . 1.417(7)    yes
C7 . H71 . 1.000(5)    no
C8 . C9 . 1.411(8)    yes
C8 . H81 . 1.000(5)    no
C9 . C10 . 1.425(7)    yes
C9 . H91 . 1.000(5)    no
C10 . C11 . 1.421(7)    yes
C10 . H101 . 1.000(5)    no
C11 . H111 . 1.000(4)    no
Ru2 . C12 . 2.077(5)    yes
Ru2 . C13 . 2.162(4)    yes
Ru2 . C14 . 2.222(5)    yes
Ru2 . C15 . 2.243(6)    yes
Ru2 . C16 . 2.165(5)    yes
Ru2 . C17 . 2.282(7)    yes
Ru2 . C18 . 2.158(5)    yes
Ru2 . C19 . 2.173(5)    yes
Ru2 . C20 . 2.176(6)    yes
Ru2 . C21 . 2.181(5)    yes
Ru2 . C22 . 2.177(5)    yes
C12 . C13 . 1.450(9)    yes
C12 . C16 . 1.38(1)    yes
C12 . C17 . 1.27(1)    yes
C13 . C14 . 1.451(9)    yes
C13 . H131 . 1.000(6)    no
C14 . C15 . 1.375(9)    yes
C14 . H141 . 1.000(6)    no
C15 . C16 . 1.457(9)    yes
C15 . H151 . 1.000(6)    no
C16 . H161 . 1.000(6)    no
C17 . H171 . 1.000(11)    no
C17 . H172 . 1.00(1)    no
C18 . C19 . 1.509(13)    yes
C18 . C22 . 1.428(9)    yes
C18 . H181 . 1.000(7)    no
C19 . C20 . 1.335(12)    yes
C19 . H191 . 1.000(6)    no
C20 . C21 . 1.32(1)    yes
C20 . H201 . 1.000(8)    no
C21 . C22 . 1.385(8)    yes
C21 . H211 . 1.000(7)    no
C22 . H221 . 1.000(5)    no
Ru3 . C23 . 2.121(5)    yes
Ru3 . C23 2_555 2.121(5)    yes
Ru3 . C24 . 2.168(6)    yes
Ru3 . C24 2_555 2.168(6)    yes
Ru3 . C25 . 2.195(5)    yes
Ru3 . C25 2_555 2.195(5)    yes
Ru3 . C26 . 2.206(5)    yes
Ru3 . C26 2_555 2.206(5)    yes
Ru3 . C27 . 2.192(5)    yes
Ru3 . C27 2_555 2.192(5)    yes
Ru3 . C28 . 2.40(1)    yes
Ru3 . C28 2_555 2.40(1)    yes
C23 . C24 . 1.456(9)    yes
C23 . C27 . 1.439(9)    yes
C23 . C28 . 1.348(13)    yes
C24 . C25 . 1.365(9)    yes
C24 . H241 . 1.000(6)    no
C25 . C26 . 1.423(7)    yes
C25 . H251 . 1.000(5)    no
C26 . C27 . 1.407(8)    yes
C26 . H261 . 1.000(6)    no
C27 . H271 . 1.000(6)    no
C28 . H281 . 1.000(12)    no
C28 . H282 . 1.000(13)    no
Ru4 . C29 . 2.111(6)    yes
Ru4 . C29 2_565 2.111(6)    yes
Ru4 . C30 . 2.162(6)    yes
Ru4 . C30 2_565 2.162(6)    yes
Ru4 . C31 . 2.183(6)    yes
Ru4 . C31 2_565 2.183(6)    yes
Ru4 . C32 . 2.201(5)    yes
Ru4 . C32 2_565 2.201(5)    yes
Ru4 . C33 . 2.190(4)    yes
Ru4 . C33 2_565 2.190(4)    yes
Ru4 . C34 . 2.251(9)    yes
Ru4 . C34 2_565 2.251(9)    yes
C29 . C30 . 1.463(14)    yes
C29 . C33 . 1.417(8)    yes
C29 . C34 . 1.087(14)    yes
C30 . C31 . 1.382(14)    yes
C30 . H301 . 1.000(7)    no
C31 . C32 . 1.420(9)    yes
C31 . H311 . 1.00(1)    no
C32 . C33 . 1.408(9)    yes
C32 . H321 . 1.000(7)    no
C33 . H331 . 1.000(6)    no
C34 . H341 . 1.000(14)    no
C34 . H342 . 1.000(16)    no
O1 . S1 . 1.436(4)    yes
O2 . S1 . 1.428(4)    yes
O3 . S1 . 1.441(4)    yes
S1 . C35 . 1.825(5)    yes
C35 . F1 . 1.329(6)    yes
C35 . F2 . 1.325(5)    yes
C35 . F3 . 1.346(6)    yes
O4 . S2 . 1.432(3)    yes
O5 . S2 . 1.441(4)    yes
O6 . S2 . 1.426(4)    yes
S2 . C36 . 1.819(5)    yes
C36 . F4 . 1.332(6)    yes
C36 . F5 . 1.331(6)    yes
C36 . F6 . 1.336(6)    yes
O7 . S3 . 1.443(3)    yes
O8 . S3 . 1.447(3)    yes
O9 . S3 . 1.436(3)    yes
S3 . C37 . 1.813(5)    yes
C37 . F7 . 1.333(5)    yes
C37 . F8 . 1.339(5)    yes
C37 . F9 . 1.331(5)    yes
loop_
  _geom_angle_atom_site_label_1
  _geom_angle_site_symmetry_1
  _geom_angle_atom_site_label_2
  _geom_angle_site_symmetry_2
  _geom_angle_atom_site_label_3
  _geom_angle_site_symmetry_3
  _geom_angle
  _geom_angle_publ_flag
C1 . Ru1 . C2 . 39.97(16)    yes
C1 . Ru1 . C3 . 64.19(17)    yes
C2 . Ru1 . C3 . 37.22(18)    yes
C1 . Ru1 . C4 . 64.65(17)    yes
C2 . Ru1 . C4 . 63.52(17)    yes
C3 . Ru1 . C4 . 37.20(16)    yes
C1 . Ru1 . C5 . 40.04(16)    yes
C2 . Ru1 . C5 . 65.57(16)    yes
C3 . Ru1 . C5 . 62.95(16)    yes
C4 . Ru1 . C5 . 37.32(17)    yes
C1 . Ru1 . C6 . 37.33(17)    yes
C2 . Ru1 . C6 . 66.34(18)    yes
C3 . Ru1 . C6 . 99.43(18)    yes
C4 . Ru1 . C6 . 99.95(18)    yes
C5 . Ru1 . C6 . 66.64(17)    yes
C1 . Ru1 . C7 . 167.13(19)    yes
C2 . Ru1 . C7 . 127.28(19)    yes
C3 . Ru1 . C7 . 104.33(19)    yes
C4 . Ru1 . C7 . 110.29(19)    yes
C5 . Ru1 . C7 . 141.79(19)    yes
C1 . Ru1 . C8 . 153.50(19)    yes
C2 . Ru1 . C8 . 160.6(2)    yes
C3 . Ru1 . C8 . 124.9(2)    yes
C4 . Ru1 . C8 . 106.44(19)    yes
C5 . Ru1 . C8 . 117.55(18)    yes
C1 . Ru1 . C9 . 129.37(18)    yes
C2 . Ru1 . C9 . 160.3(2)    yes
C3 . Ru1 . C9 . 162.5(2)    yes
C4 . Ru1 . C9 . 132.46(18)    yes
C5 . Ru1 . C9 . 118.38(16)    yes
C1 . Ru1 . C10 . 123.64(17)    yes
C2 . Ru1 . C10 . 126.91(18)    yes
C3 . Ru1 . C10 . 149.68(18)    yes
C4 . Ru1 . C10 . 169.45(17)    yes
C5 . Ru1 . C10 . 144.04(17)    yes
C1 . Ru1 . C11 . 140.13(17)    yes
C2 . Ru1 . C11 . 113.54(16)    yes
C3 . Ru1 . C11 . 115.48(17)    yes
C4 . Ru1 . C11 . 141.15(18)    yes
C5 . Ru1 . C11 . 178.37(16)    yes
C6 . Ru1 . C7 . 149.77(19)    yes
C6 . Ru1 . C8 . 133.0(2)    yes
C7 . Ru1 . C8 . 37.7(2)    yes
C6 . Ru1 . C9 . 96.7(2)    yes
C7 . Ru1 . C9 . 63.1(2)    yes
C8 . Ru1 . C9 . 37.7(2)    yes
C6 . Ru1 . C10 . 87.05(18)    yes
C7 . Ru1 . C10 . 63.08(19)    yes
C8 . Ru1 . C10 . 63.17(19)    yes
C9 . Ru1 . C10 . 37.95(18)    yes
C6 . Ru1 . C11 . 114.42(18)    yes
C7 . Ru1 . C11 . 37.49(18)    yes
C8 . Ru1 . C11 . 62.79(18)    yes
C9 . Ru1 . C11 . 62.95(17)    yes
C10 . Ru1 . C11 . 37.59(18)    yes
Ru1 . C1 . C2 . 73.6(2)    yes
Ru1 . C1 . C5 . 73.5(2)    yes
C2 . C1 . C5 . 107.8(4)    yes
Ru1 . C1 . C6 . 78.8(3)    yes
C2 . C1 . C6 . 116.6(4)    yes
C5 . C1 . C6 . 117.1(4)    yes
Ru1 . C2 . C1 . 66.4(2)    yes
Ru1 . C2 . C3 . 74.0(3)    yes
C1 . C2 . C3 . 106.6(4)    yes
Ru1 . C2 . H21 . 124.4(3)    no
C1 . C2 . H21 . 126.7(5)    no
C3 . C2 . H21 . 126.7(5)    no
Ru1 . C3 . C2 . 68.8(2)    yes
Ru1 . C3 . C4 . 71.0(2)    yes
C2 . C3 . C4 . 109.7(4)    yes
Ru1 . C3 . H31 . 126.6(4)    no
C2 . C3 . H31 . 125.2(5)    no
C4 . C3 . H31 . 125.2(5)    no
Ru1 . C4 . C3 . 71.8(2)    yes
Ru1 . C4 . C5 . 69.0(2)    yes
C3 . C4 . C5 . 108.7(4)    yes
Ru1 . C4 . H41 . 125.1(4)    no
C3 . C4 . H41 . 125.7(4)    no
C5 . C4 . H41 . 125.7(4)    no
Ru1 . C5 . C1 . 66.5(2)    yes
Ru1 . C5 . C4 . 73.7(3)    yes
C1 . C5 . C4 . 107.2(4)    yes
Ru1 . C5 . H51 . 125.0(3)    no
C1 . C5 . H51 . 126.4(4)    no
C4 . C5 . H51 . 126.4(4)    no
Ru1 . C6 . C1 . 63.9(2)    yes
Ru1 . C6 . H61 . 102.7(3)    no
C1 . C6 . H61 . 120.0(4)    no
Ru1 . C6 . H62 . 102.7(3)    no
C1 . C6 . H62 . 120.0(5)    no
H61 . C6 . H62 . 120.0(5)    no
Ru1 . C7 . C8 . 70.6(3)    yes
Ru1 . C7 . C11 . 72.0(3)    yes
C8 . C7 . C11 . 107.9(5)    yes
Ru1 . C7 . H71 . 123.0(4)    no
C8 . C7 . H71 . 126.0(5)    no
C11 . C7 . H71 . 126.0(5)    no
Ru1 . C8 . C7 . 71.7(3)    yes
Ru1 . C8 . C9 . 71.4(3)    yes
C7 . C8 . C9 . 108.5(4)    yes
Ru1 . C8 . H81 . 122.8(4)    no
C7 . C8 . H81 . 125.7(6)    no
C9 . C8 . H81 . 125.7(6)    no
Ru1 . C9 . C8 . 70.9(3)    yes
Ru1 . C9 . C10 . 71.4(3)    yes
C8 . C9 . C10 . 107.8(4)    yes
Ru1 . C9 . H91 . 123.3(4)    no
C8 . C9 . H91 . 126.1(5)    no
C10 . C9 . H91 . 126.1(5)    no
Ru1 . C10 . C9 . 70.7(2)    yes
Ru1 . C10 . C11 . 72.0(2)    yes
C9 . C10 . C11 . 107.7(4)    yes
Ru1 . C10 . H101 . 122.9(3)    no
C9 . C10 . H101 . 126.1(5)    no
C11 . C10 . H101 . 126.1(5)    no
Ru1 . C11 . C7 . 70.5(3)    yes
Ru1 . C11 . C10 . 70.5(2)    yes
C7 . C11 . C10 . 108.0(4)    yes
Ru1 . C11 . H111 . 124.7(3)    no
C7 . C11 . H111 . 126.0(5)    no
C10 . C11 . H111 . 126.0(5)    no
C12 . Ru2 . C13 . 39.9(3)    yes
C12 . Ru2 . C14 . 64.1(3)    yes
C13 . Ru2 . C14 . 38.6(2)    yes
C12 . Ru2 . C15 . 64.1(3)    yes
C13 . Ru2 . C15 . 63.8(2)    yes
C14 . Ru2 . C15 . 35.9(2)    yes
C12 . Ru2 . C16 . 38.0(3)    yes
C13 . Ru2 . C16 . 64.9(2)    yes
C14 . Ru2 . C16 . 62.5(2)    yes
C15 . Ru2 . C16 . 38.5(3)    yes
C12 . Ru2 . C17 . 33.5(3)    yes
C13 . Ru2 . C17 . 63.7(3)    yes
C14 . Ru2 . C17 . 96.4(3)    yes
C15 . Ru2 . C17 . 95.3(3)    yes
C16 . Ru2 . C17 . 60.5(3)    yes
C12 . Ru2 . C18 . 170.7(3)    yes
C13 . Ru2 . C18 . 136.1(3)    yes
C14 . Ru2 . C18 . 107.8(3)    yes
C15 . Ru2 . C18 . 106.7(3)    yes
C16 . Ru2 . C18 . 135.3(3)    yes
C12 . Ru2 . C19 . 142.5(3)    yes
C13 . Ru2 . C19 . 175.8(4)    yes
C14 . Ru2 . C19 . 137.2(4)    yes
C15 . Ru2 . C19 . 113.2(3)    yes
C16 . Ru2 . C19 . 115.0(2)    yes
C12 . Ru2 . C20 . 124.2(3)    yes
C13 . Ru2 . C20 . 148.2(3)    yes
C14 . Ru2 . C20 . 171.6(3)    yes
C15 . Ru2 . C20 . 143.3(3)    yes
C16 . Ru2 . C20 . 122.5(2)    yes
C12 . Ru2 . C21 . 126.0(3)    yes
C13 . Ru2 . C21 . 122.0(2)    yes
C14 . Ru2 . C21 . 143.0(3)    yes
C15 . Ru2 . C21 . 169.8(2)    yes
C16 . Ru2 . C21 . 150.1(2)    yes
C12 . Ru2 . C22 . 147.2(3)    yes
C13 . Ru2 . C22 . 115.73(19)    yes
C14 . Ru2 . C22 . 112.6(2)    yes
C15 . Ru2 . C22 . 133.9(3)    yes
C16 . Ru2 . C22 . 172.1(2)    yes
C17 . Ru2 . C18 . 155.5(3)    yes
C17 . Ru2 . C19 . 120.2(4)    yes
C18 . Ru2 . C19 . 40.8(3)    yes
C17 . Ru2 . C20 . 92.0(3)    yes
C18 . Ru2 . C20 . 63.9(3)    yes
C19 . Ru2 . C20 . 35.8(3)    yes
C17 . Ru2 . C21 . 95.0(3)    yes
C18 . Ru2 . C21 . 63.1(3)    yes
C19 . Ru2 . C21 . 60.4(3)    yes
C20 . Ru2 . C21 . 35.3(3)    yes
C17 . Ru2 . C22 . 127.2(3)    yes
C18 . Ru2 . C22 . 38.4(3)    yes
C19 . Ru2 . C22 . 63.7(2)    yes
C20 . Ru2 . C22 . 61.6(2)    yes
C21 . Ru2 . C22 . 37.1(2)    yes
Ru2 . C12 . C13 . 73.2(3)    yes
Ru2 . C12 . C16 . 74.5(3)    yes
C13 . C12 . C16 . 110.1(6)    yes
Ru2 . C12 . C17 . 82.1(4)    yes
C13 . C12 . C17 . 119.2(9)    yes
C16 . C12 . C17 . 115.3(8)    yes
Ru2 . C13 . C12 . 66.9(3)    yes
Ru2 . C13 . C14 . 72.9(3)    yes
C12 . C13 . C14 . 103.9(5)    yes
Ru2 . C13 . H131 . 123.9(4)    no
C12 . C13 . H131 . 128.0(6)    no
C14 . C13 . H131 . 128.0(6)    no
Ru2 . C14 . C13 . 68.5(3)    yes
Ru2 . C14 . C15 . 72.9(3)    yes
C13 . C14 . C15 . 111.0(6)    yes
Ru2 . C14 . H141 . 125.7(4)    no
C13 . C14 . H141 . 124.5(7)    no
C15 . C14 . H141 . 124.5(7)    no
Ru2 . C15 . C14 . 71.2(3)    yes
Ru2 . C15 . C16 . 67.8(3)    yes
C14 . C15 . C16 . 107.0(6)    yes
Ru2 . C15 . H151 . 126.0(5)    no
C14 . C15 . H151 . 126.5(7)    no
C16 . C15 . H151 . 126.5(7)    no
Ru2 . C16 . C12 . 67.6(3)    yes
Ru2 . C16 . C15 . 73.6(3)    yes
C12 . C16 . C15 . 107.9(5)    yes
Ru2 . C16 . H161 . 124.3(4)    no
C12 . C16 . H161 . 126.1(7)    no
C15 . C16 . H161 . 126.1(7)    no
Ru2 . C17 . C12 . 64.4(4)    yes
Ru2 . C17 . H171 . 101.7(6)    no
C12 . C17 . H171 . 120.0(10)    no
Ru2 . C17 . H172 . 103.3(5)    no
C12 . C17 . H172 . 120.0(11)    no
H171 . C17 . H172 . 120.0(8)    no
Ru2 . C18 . C19 . 70.1(3)    yes
Ru2 . C18 . C22 . 71.5(3)    yes
C19 . C18 . C22 . 102.9(6)    yes
Ru2 . C18 . H181 . 121.8(5)    no
C19 . C18 . H181 . 128.5(9)    no
C22 . C18 . H181 . 128.5(9)    no
Ru2 . C19 . C18 . 69.1(3)    yes
Ru2 . C19 . C20 . 72.2(3)    yes
C18 . C19 . C20 . 107.3(5)    yes
Ru2 . C19 . H191 . 123.9(4)    no
C18 . C19 . H191 . 126.4(11)    no
C20 . C19 . H191 . 126.4(12)    no
Ru2 . C20 . C19 . 72.0(4)    yes
Ru2 . C20 . C21 . 72.6(3)    yes
C19 . C20 . C21 . 111.2(7)    yes
Ru2 . C20 . H201 . 122.6(5)    no
C19 . C20 . H201 . 124.4(9)    no
C21 . C20 . H201 . 124.4(10)    no
Ru2 . C21 . C20 . 72.2(4)    yes
Ru2 . C21 . C22 . 71.3(3)    yes
C20 . C21 . C22 . 110.9(7)    yes
Ru2 . C21 . H211 . 123.5(4)    no
C20 . C21 . H211 . 124.6(7)    no
C22 . C21 . H211 . 124.6(7)    no
Ru2 . C22 . C18 . 70.1(3)    yes
Ru2 . C22 . C21 . 71.6(3)    yes
C18 . C22 . C21 . 107.7(6)    yes
Ru2 . C22 . H221 . 123.8(3)    no
C18 . C22 . H221 . 126.2(7)    no
C21 . C22 . H221 . 126.2(6)    no
C23 . Ru3 . C23 2_555 179.995    yes
C23 . Ru3 . C24 . 39.7(3)    yes
C23 2_555 Ru3 . C24 . 140.3(3)    yes
C23 . Ru3 . C24 2_555 140.3(3)    yes
C23 2_555 Ru3 . C24 2_555 39.7(3)    yes
C24 . Ru3 . C24 2_555 179.995    yes
C23 . Ru3 . C25 . 62.7(2)    yes
C23 2_555 Ru3 . C25 . 117.3(2)    yes
C24 . Ru3 . C25 . 36.4(2)    yes
C24 2_555 Ru3 . C25 . 143.6(2)    yes
C23 . Ru3 . C25 2_555 117.3(2)    yes
C23 2_555 Ru3 . C25 2_555 62.7(2)    yes
C24 . Ru3 . C25 2_555 143.6(2)    yes
C24 2_555 Ru3 . C25 2_555 36.4(2)    yes
C25 . Ru3 . C25 2_555 179.995    yes
C23 . Ru3 . C26 . 63.8(2)    yes
C23 2_555 Ru3 . C26 . 116.2(2)    yes
C24 . Ru3 . C26 . 63.8(2)    yes
C24 2_555 Ru3 . C26 . 116.2(2)    yes
C25 . Ru3 . C26 . 37.7(2)    yes
C23 . Ru3 . C26 2_555 116.2(2)    yes
C23 2_555 Ru3 . C26 2_555 63.8(2)    yes
C24 . Ru3 . C26 2_555 116.2(2)    yes
C24 2_555 Ru3 . C26 2_555 63.8(2)    yes
C25 . Ru3 . C26 2_555 142.3(2)    yes
C23 . Ru3 . C27 . 38.9(3)    yes
C23 2_555 Ru3 . C27 . 141.1(3)    yes
C24 . Ru3 . C27 . 65.2(2)    yes
C24 2_555 Ru3 . C27 . 114.8(2)    yes
C25 . Ru3 . C27 . 62.50(19)    yes
C23 . Ru3 . C27 2_555 141.1(3)    yes
C23 2_555 Ru3 . C27 2_555 38.9(3)    yes
C24 . Ru3 . C27 2_555 114.8(2)    yes
C24 2_555 Ru3 . C27 2_555 65.2(2)    yes
C25 . Ru3 . C27 2_555 117.50(19)    yes
C23 . Ru3 . C28 . 34.0(3)    yes
C23 2_555 Ru3 . C28 . 146.0(3)    yes
C24 . Ru3 . C28 . 60.0(4)    yes
C24 2_555 Ru3 . C28 . 120.0(4)    yes
C25 . Ru3 . C28 . 92.9(4)    yes
C23 . Ru3 . C28 2_555 146.0(3)    yes
C23 2_555 Ru3 . C28 2_555 34.0(3)    yes
C24 . Ru3 . C28 2_555 120.0(4)    yes
C24 2_555 Ru3 . C28 2_555 60.0(4)    yes
C25 . Ru3 . C28 2_555 87.1(4)    yes
C25 2_555 Ru3 . C26 . 142.3(2)    yes
C25 2_555 Ru3 . C26 2_555 37.7(2)    yes
C26 . Ru3 . C26 2_555 179.995    yes
C25 2_555 Ru3 . C27 . 117.50(19)    yes
C26 . Ru3 . C27 . 37.3(2)    yes
C26 2_555 Ru3 . C27 . 142.7(2)    yes
C25 2_555 Ru3 . C27 2_555 62.50(19)    yes
C26 . Ru3 . C27 2_555 142.7(2)    yes
C26 2_555 Ru3 . C27 2_555 37.3(2)    yes
C27 . Ru3 . C27 2_555 179.995    yes
C25 2_555 Ru3 . C28 . 87.1(4)    yes
C26 . Ru3 . C28 . 97.2(3)    yes
C26 2_555 Ru3 . C28 . 82.8(3)    yes
C27 . Ru3 . C28 . 65.5(3)    yes
C27 2_555 Ru3 . C28 . 114.5(3)    yes
C25 2_555 Ru3 . C28 2_555 92.9(4)    yes
C26 . Ru3 . C28 2_555 82.8(3)    yes
C26 2_555 Ru3 . C28 2_555 97.2(3)    yes
C27 . Ru3 . C28 2_555 114.5(3)    yes
C27 2_555 Ru3 . C28 2_555 65.5(3)    yes
C28 . Ru3 . C28 2_555 179.995    yes
Ru3 . C23 . C24 . 71.9(3)    yes
Ru3 . C23 . C27 . 73.2(3)    yes
C24 . C23 . C27 . 108.3(5)    yes
Ru3 . C23 . C28 . 84.2(5)    yes
C24 . C23 . C28 . 109.6(8)    yes
C27 . C23 . C28 . 126.4(8)    yes
Ru3 . C23 . H231 . 120.8(5)    no
C24 . C23 . H231 . 125.8(7)    no
C27 . C23 . H231 . 125.8(7)    no
C28 . C23 . H231 . 37.5(5)    no
Ru3 . C24 . C23 . 68.4(3)    yes
Ru3 . C24 . C25 . 72.9(3)    yes
C23 . C24 . C25 . 105.6(5)    yes
Ru3 . C24 . H241 . 123.2(5)    no
C23 . C24 . H241 . 127.2(7)    no
C25 . C24 . H241 . 127.2(7)    no
Ru3 . C25 . C24 . 70.7(3)    yes
Ru3 . C25 . C26 . 71.5(3)    yes
C24 . C25 . C26 . 111.9(5)    yes
Ru3 . C25 . H251 . 125.3(4)    no
C24 . C25 . H251 . 124.0(6)    no
C26 . C25 . H251 . 124.0(6)    no
Ru3 . C26 . C25 . 70.7(3)    yes
Ru3 . C26 . C27 . 70.8(3)    yes
C25 . C26 . C27 . 107.1(5)    yes
Ru3 . C26 . H261 . 123.7(4)    no
C25 . C26 . H261 . 126.5(6)    no
C27 . C26 . H261 . 126.5(5)    no
Ru3 . C27 . C23 . 67.9(3)    yes
Ru3 . C27 . C26 . 71.9(3)    yes
C23 . C27 . C26 . 107.0(5)    yes
Ru3 . C27 . H271 . 125.3(4)    no
C23 . C27 . H271 . 126.5(6)    no
C26 . C27 . H271 . 126.5(7)    no
Ru3 . C28 . C23 . 61.7(4)    yes
Ru3 . C28 . H281 . 103.8(8)    no
C23 . C28 . H281 . 120.0(12)    no
H231 . C28 . H281 . 118.2(13)    no
Ru3 . C28 . H282 . 103.6(7)    no
C23 . C28 . H282 . 120.0(11)    no
H231 . C28 . H282 . 101.6(12)    no
H281 . C28 . H282 . 120.0(11)    no
C29 . Ru4 . C29 2_565 179.995    yes
C29 . Ru4 . C30 . 40.0(4)    yes
C29 2_565 Ru4 . C30 . 140.0(4)    yes
C29 . Ru4 . C30 2_565 140.0(4)    yes
C29 2_565 Ru4 . C30 2_565 40.0(4)    yes
C30 . Ru4 . C30 2_565 179.995    yes
C29 . Ru4 . C31 . 63.7(4)    yes
C29 2_565 Ru4 . C31 . 116.3(4)    yes
C30 . Ru4 . C31 . 37.1(4)    yes
C30 2_565 Ru4 . C31 . 142.9(4)    yes
C29 . Ru4 . C31 2_565 116.3(4)    yes
C29 2_565 Ru4 . C31 2_565 63.7(4)    yes
C30 . Ru4 . C31 2_565 142.9(4)    yes
C30 2_565 Ru4 . C31 2_565 37.1(4)    yes
C31 . Ru4 . C31 2_565 179.995    yes
C29 . Ru4 . C32 . 63.2(3)    yes
C29 2_565 Ru4 . C32 . 116.8(3)    yes
C30 . Ru4 . C32 . 63.4(3)    yes
C30 2_565 Ru4 . C32 . 116.6(3)    yes
C31 . Ru4 . C32 . 37.8(2)    yes
C29 . Ru4 . C32 2_565 116.8(3)    yes
C29 2_565 Ru4 . C32 2_565 63.2(3)    yes
C30 . Ru4 . C32 2_565 116.6(3)    yes
C30 2_565 Ru4 . C32 2_565 63.4(3)    yes
C31 . Ru4 . C32 2_565 142.2(2)    yes
C29 . Ru4 . C33 . 38.4(2)    yes
C29 2_565 Ru4 . C33 . 141.6(2)    yes
C30 . Ru4 . C33 . 65.3(2)    yes
C30 2_565 Ru4 . C33 . 114.7(2)    yes
C31 . Ru4 . C33 . 63.5(3)    yes
C29 . Ru4 . C33 2_565 141.6(2)    yes
C29 2_565 Ru4 . C33 2_565 38.4(2)    yes
C30 . Ru4 . C33 2_565 114.7(2)    yes
C30 2_565 Ru4 . C33 2_565 65.3(2)    yes
C31 . Ru4 . C33 2_565 116.5(3)    yes
C29 . Ru4 . C34 . 28.6(4)    yes
C29 2_565 Ru4 . C34 . 151.4(4)    yes
C30 . Ru4 . C34 . 54.3(5)    yes
C30 2_565 Ru4 . C34 . 125.7(5)    yes
C31 . Ru4 . C34 . 87.7(5)    yes
C29 . Ru4 . C34 2_565 151.4(4)    yes
C29 2_565 Ru4 . C34 2_565 28.6(4)    yes
C30 . Ru4 . C34 2_565 125.7(5)    yes
C30 2_565 Ru4 . C34 2_565 54.3(5)    yes
C31 . Ru4 . C34 2_565 92.3(5)    yes
C31 2_565 Ru4 . C32 . 142.2(2)    yes
C31 2_565 Ru4 . C32 2_565 37.8(2)    yes
C32 . Ru4 . C32 2_565 179.995    yes
C31 2_565 Ru4 . C33 . 116.5(3)    yes
C32 . Ru4 . C33 . 37.4(2)    yes
C32 2_565 Ru4 . C33 . 142.6(2)    yes
C31 2_565 Ru4 . C33 2_565 63.5(3)    yes
C32 . Ru4 . C33 2_565 142.6(2)    yes
C32 2_565 Ru4 . C33 2_565 37.4(2)    yes
C33 . Ru4 . C33 2_565 179.995    yes
C31 2_565 Ru4 . C34 . 92.3(5)    yes
C32 . Ru4 . C34 . 91.6(4)    yes
C32 2_565 Ru4 . C34 . 88.4(4)    yes
C33 . Ru4 . C34 . 61.7(4)    yes
C33 2_565 Ru4 . C34 . 118.3(4)    yes
C31 2_565 Ru4 . C34 2_565 87.7(5)    yes
C32 . Ru4 . C34 2_565 88.4(4)    yes
C32 2_565 Ru4 . C34 2_565 91.6(4)    yes
C33 . Ru4 . C34 2_565 118.3(4)    yes
C33 2_565 Ru4 . C34 2_565 61.7(4)    yes
C34 . Ru4 . C34 2_565 179.995    yes
Ru4 . C29 . C30 . 71.8(4)    yes
Ru4 . C29 . C33 . 73.8(3)    yes
C30 . C29 . C33 . 109.2(8)    yes
Ru4 . C29 . C34 . 82.9(6)    yes
C30 . C29 . C34 . 103.5(11)    yes
C33 . C29 . C34 . 130.7(12)    yes
Ru4 . C30 . C29 . 68.1(4)    yes
Ru4 . C30 . C31 . 72.3(4)    yes
C29 . C30 . C31 . 105.6(6)    yes
Ru4 . C30 . H301 . 124.0(5)    no
C29 . C30 . H301 . 127.2(11)    no
C31 . C30 . H301 . 127.2(11)    no
Ru4 . C31 . C30 . 70.6(4)    yes
Ru4 . C31 . C32 . 71.8(3)    yes
C30 . C31 . C32 . 109.8(8)    yes
Ru4 . C31 . H311 . 124.1(6)    no
C30 . C31 . H311 . 125.1(8)    no
C32 . C31 . H311 . 125.1(10)    no
Ru4 . C32 . C31 . 70.4(3)    yes
Ru4 . C32 . C33 . 70.9(3)    yes
C31 . C32 . C33 . 109.0(7)    yes
Ru4 . C32 . H321 . 124.8(4)    no
C31 . C32 . H321 . 125.5(8)    no
C33 . C32 . H321 . 125.5(6)    no
Ru4 . C33 . C29 . 67.8(3)    yes
Ru4 . C33 . C32 . 71.7(3)    yes
C29 . C33 . C32 . 106.2(6)    yes
Ru4 . C33 . H331 . 125.2(4)    no
C29 . C33 . H331 . 126.9(7)    no
C32 . C33 . H331 . 126.9(6)    no
Ru4 . C34 . C29 . 68.5(6)    yes
Ru4 . C34 . H341 . 100.1(7)    no
C29 . C34 . H341 . 120.0(17)    no
H291 . C34 . H341 . 88.8(13)    no
Ru4 . C34 . H342 . 101.0(7)    no
C29 . C34 . H342 . 120.0(14)    no
H291 . C34 . H342 . 117.9(14)    no
H341 . C34 . H342 . 120.0(14)    no
O1 . S1 . O2 . 114.8(2)    yes
O1 . S1 . O3 . 114.8(3)    yes
O2 . S1 . O3 . 115.3(3)    yes
O1 . S1 . C35 . 102.9(2)    yes
O2 . S1 . C35 . 103.3(2)    yes
O3 . S1 . C35 . 103.3(2)    yes
S1 . C35 . F1 . 111.8(3)    yes
S1 . C35 . F2 . 111.3(3)    yes
F1 . C35 . F2 . 107.9(4)    yes
S1 . C35 . F3 . 111.2(3)    yes
F1 . C35 . F3 . 106.8(4)    yes
F2 . C35 . F3 . 107.6(4)    yes
O4 . S2 . O5 . 114.7(2)    yes
O4 . S2 . O6 . 115.2(2)    yes
O5 . S2 . O6 . 114.9(3)    yes
O4 . S2 . C36 . 103.3(2)    yes
O5 . S2 . C36 . 103.0(2)    yes
O6 . S2 . C36 . 103.3(2)    yes
S2 . C36 . F4 . 112.3(4)    yes
S2 . C36 . F5 . 112.5(3)    yes
F4 . C36 . F5 . 107.2(4)    yes
S2 . C36 . F6 . 111.2(3)    yes
F4 . C36 . F6 . 106.8(4)    yes
F5 . C36 . F6 . 106.5(4)    yes
O7 . S3 . O8 . 115.0(2)    yes
O7 . S3 . O9 . 115.21(19)    yes
O8 . S3 . O9 . 114.2(2)    yes
O7 . S3 . C37 . 102.8(2)    yes
O8 . S3 . C37 . 103.3(2)    yes
O9 . S3 . C37 . 104.0(2)    yes
S3 . C37 . F7 . 112.9(3)    yes
S3 . C37 . F8 . 112.0(3)    yes
F7 . C37 . F8 . 106.5(4)    yes
S3 . C37 . F9 . 111.6(3)    yes
F7 . C37 . F9 . 106.9(4)    yes
F8 . C37 . F9 . 106.6(4)    yes

#===END

#  CIF produced by WinGX routine CIF_UPDATE
#  Created on 2001-07-04 at 16:41:38
#  Using CIFtbx version 2.6.2 16 Jun 1998

#  Dictionary name : cif_core.dic
#  Dictionary vers : 2.1
#  Request file    : c:\wingx\files\archive.dat
#  CIF files read  : sb1 struct


data_RcCH2PPh3BF4

_audit_creation_date            2001-07-04T16:41:38-00:00
_audit_creation_method         'WinGX routine CIF_UPDATE'
_audit_conform_dict_name        cif_core.dic
_audit_conform_dict_version     2.1
_audit_conform_dict_location    ftp://ftp.iucr.org/cifdics/cif_core.dic
_publ_requested_category        FM

#----------------------------------------------------------------------------#
#                   CHEMICAL INFORMATION                                     #
#----------------------------------------------------------------------------#

_chemical_name_systematic
;
(ruthenocenylmethyl)triphenylphosphonium tetrafluoroborate 
dichloromethane solvate
;
_chemical_formula_moiety                'C29 H26 B1 F4 P1 Ru1'
_chemical_formula_structural            'C29 H26 P1 RU B F4'
_chemical_formula_sum                   'C29.50 H27 B Cl F4 P Ru'
_chemical_formula_weight                635.81
_chemical_compound_source               'synthesis as described'

#----------------------------------------------------------------------------#
#                   UNIT CELL INFORMATION                                    #
#----------------------------------------------------------------------------#

_symmetry_cell_setting                  monoclinic
_symmetry_space_group_name_H-M          'C 2/c'
_symmetry_space_group_name_Hall         '-C 2yc'
_symmetry_Int_Tables_number             15
loop_
     _symmetry_equiv_pos_as_xyz
'x, y, z'
'-x, y, -z+1/2'
'x+1/2, y+1/2, z'
'-x+1/2, y+1/2, -z+1/2'
'-x, -y, -z'
'x, -y, z-1/2'
'-x+1/2, -y+1/2, -z'
'x+1/2, -y+1/2, z-1/2'

_cell_length_a                          33.0591(7)
_cell_length_b                          12.5182(3)
_cell_length_c                          13.7757(3)
_cell_angle_alpha                       90
_cell_angle_beta                        101.5910(10)
_cell_angle_gamma                       90
_cell_volume                            5584.7(2)
_cell_formula_units_Z                   8
_cell_measurement_temperature           150(2)
_cell_measurement_reflns_used           0
_cell_measurement_theta_min             0
_cell_measurement_theta_max             0
_cell_measurement_wavelength            0.71073

#----------------------------------------------------------------------------#
#                   CRYSTAL INFORMATION                                      #
#----------------------------------------------------------------------------#

_exptl_crystal_description              plate
_exptl_crystal_colour                   colourless
_exptl_crystal_size_max                 0.3
_exptl_crystal_size_mid                 0.2
_exptl_crystal_size_min                 0.1
_exptl_crystal_density_diffrn           1.512
_exptl_crystal_density_method           'not measured'
_exptl_crystal_F_000                    2568
_exptl_special_details
;
  ?
;

#----------------------------------------------------------------------------#
#                   ABSORPTION CORRECTION                                    #
#----------------------------------------------------------------------------#

_exptl_absorpt_coefficient_mu           0.759

#----------------------------------------------------------------------------#
#                   DATA COLLECTION                                          #
#----------------------------------------------------------------------------#

_diffrn_ambient_temperature             150(2)
_diffrn_radiation_wavelength            0.71073
_diffrn_radiation_type                  MoK\a
_diffrn_radiation_monochromator         graphite
_diffrn_radiation_probe                 x-ray
_diffrn_reflns_number                   10107
_diffrn_reflns_av_R_equivalents         0.0465
_diffrn_reflns_av_unetI/netI            0.0995
_diffrn_reflns_limit_h_min              -42
_diffrn_reflns_limit_h_max              42
_diffrn_reflns_limit_k_min              -14
_diffrn_reflns_limit_k_max              16
_diffrn_reflns_limit_l_min              -17
_diffrn_reflns_limit_l_max              17
_diffrn_reflns_theta_min                3.38
_diffrn_reflns_theta_max                27.48
_diffrn_reflns_theta_full               27.48
_diffrn_measured_fraction_theta_full
                                         0.986
_diffrn_measured_fraction_theta_max
                                         0.986
_reflns_number_total                    6308
_reflns_number_gt                       4083
_reflns_threshold_expression            >2sigma(I)

#----------------------------------------------------------------------------#
#                   COMPUTER PROGRAMS USED                                   #
#----------------------------------------------------------------------------#

_computing_structure_refinement         'SHELXL-97 (Sheldrick, 1997)'
_computing_molecular_graphics           'Ortep-3 for Windows (Farrugia, 1997)'
_computing_publication_material
                                    'WinGX publication routines 
(Farrugia, 1999)'

#----------------------------------------------------------------------------#
#                   REFINEMENT INFORMATION                                   #
#----------------------------------------------------------------------------#

_refine_special_details
;
  Refinement of F^2^ against ALL reflections.  The weighted R-factor wR and
  goodness of fit S are based on F^2^, conventional R-factors R are based
  on F, with F set to zero for negative F^2^. The threshold expression of
  F^2^ > 2sigma(F^2^) is used only for calculating R-factors(gt) etc. and is
  not relevant to the choice of reflections for refinement.  R-factors based
  on F^2^ are statistically about twice as large as those based on F, and R-
  factors based on ALL data will be even larger.
;
_refine_ls_structure_factor_coef        Fsqd
_refine_ls_matrix_type                  full
_refine_ls_weighting_scheme             calc
_refine_ls_weighting_details
          'calc w=1/[\s^2^(Fo^2^)+(0.0986P)^2^+7.1400P] where 
P=(Fo^2^+2Fc^2^)/3'
_atom_sites_solution_primary            direct
_atom_sites_solution_secondary          difmap
_atom_sites_solution_hydrogens          geom
_refine_ls_hydrogen_treatment           mixed
_refine_ls_extinction_method            SHELXL
_refine_ls_extinction_expression
 
Fc^*^=kFc[1+0.001xFc^2^\l^3^/sin(2\q)]^-1/4^
_refine_ls_extinction_coef              0.00073(18)
_refine_ls_number_reflns                6308
_refine_ls_number_parameters            350
_refine_ls_number_restraints            1
_refine_ls_R_factor_all                 0.1121
_refine_ls_R_factor_gt                  0.0632
_refine_ls_wR_factor_ref                0.1854
_refine_ls_wR_factor_gt                 0.1607
_refine_ls_goodness_of_fit_ref          1.054
_refine_ls_restrained_S_all             1.054
_refine_ls_shift/su_max                 0.001
_refine_ls_shift/su_mean                0
_refine_diff_density_max                1.689
_refine_diff_density_min                -1.069
_refine_diff_density_rms                0.149

#----------------------------------------------------------------------------#
#                   ATOMIC TYPES, COORDINATES AND THERMAL PARAMETERS         #
#----------------------------------------------------------------------------#

loop_
     _atom_type_symbol
     _atom_type_description
     _atom_type_scat_dispersion_real
     _atom_type_scat_dispersion_imag
     _atom_type_scat_source
C C 0.0033 0.0016 'International Tables Vol C Tables 4.2.6.8 and 6.1.1.4'
H H 0 0 'International Tables Vol C Tables 4.2.6.8 and 6.1.1.4'
B B 0.0013 0.0007 'International Tables Vol C Tables 4.2.6.8 and 6.1.1.4'
F F 0.0171 0.0103 'International Tables Vol C Tables 4.2.6.8 and 6.1.1.4'
P P 0.1023 0.0942 'International Tables Vol C Tables 4.2.6.8 and 6.1.1.4'
Ru Ru -1.2594 0.8363 'International Tables Vol C Tables 4.2.6.8 and 6.1.1.4'
Cl Cl 0.1484 0.1585 'International Tables Vol C Tables 4.2.6.8 and 6.1.1.4'

loop_
     _atom_site_label
     _atom_site_type_symbol
     _atom_site_fract_x
     _atom_site_fract_y
     _atom_site_fract_z
     _atom_site_U_iso_or_equiv
     _atom_site_adp_type
     _atom_site_occupancy
     _atom_site_symmetry_multiplicity
     _atom_site_calc_flag
     _atom_site_refinement_flags
     _atom_site_disorder_assembly
     _atom_site_disorder_group
Ru Ru 0.259724(13) 0.59577(3) 0.14793(3) 0.02032(18) Uani 1 1 d . . .
P P 0.39089(4) 0.70752(12) 0.34884(10) 0.0231(3) Uani 1 1 d . . .
C1 C 0.21117(18) 0.5062(5) 0.0544(4) 0.0321(14) Uani 1 1 d . . .
H1 H 0.1867 0.4841 0.0751 0.038 Uiso 1 1 calc R . .
C2 C 0.24838(19) 0.4462(5) 0.0667(4) 0.0296(13) Uani 1 1 d . . .
H2 H 0.2532 0.3777 0.0964 0.036 Uiso 1 1 calc R . .
C3 C 0.27720(18) 0.5086(4) 0.0260(4) 0.0274(13) Uani 1 1 d . . .
H3 H 0.3048 0.4889 0.0244 0.033 Uiso 1 1 calc R . .
C4 C 0.25754(19) 0.6045(4) -0.0113(4) 0.0292(13) Uani 1 1 d . . .
H4 H 0.2695 0.6601 -0.043 0.035 Uiso 1 1 calc R . .
C5 C 0.21623(19) 0.6032(5) 0.0068(4) 0.0307(13) Uani 1 1 d . . .
H5 H 0.1961 0.6577 -0.0102 0.037 Uiso 1 1 calc R . .
C6 C 0.28756(17) 0.7357(5) 0.2268(4) 0.0263(12) Uani 1 1 d . . .
H6 H 0.2964 0.7967 0.1957 0.032 Uiso 1 1 calc R . .
C7 C 0.24743(18) 0.7197(5) 0.2486(4) 0.0297(13) Uani 1 1 d . . .
H7 H 0.2248 0.7679 0.2342 0.036 Uiso 1 1 calc R . .
C8 C 0.24753(19) 0.6186(5) 0.2958(4) 0.0332(15) Uani 1 1 d . . .
H8 H 0.2248 0.5875 0.3179 0.04 Uiso 1 1 calc R . .
C9 C 0.28759(18) 0.5714(5) 0.3045(4) 0.0283(13) Uani 1 1 d . . .
H9 H 0.2963 0.5046 0.3342 0.034 Uiso 1 1 calc R . .
C10 C 0.31194(16) 0.6442(5) 0.2599(4) 0.0237(12) Uani 1 1 d . . .
C11 C 0.35702(17) 0.6263(5) 0.2577(4) 0.0333(14) Uani 1 1 d . . .
H11A H 0.3618 0.6437 0.1908 0.04 Uiso 1 1 calc R . .
H11B H 0.3638 0.5499 0.2707 0.04 Uiso 1 1 calc R . .
C12 C 0.44325(16) 0.6625(5) 0.3600(4) 0.0258(12) Uani 1 1 d . . .
C13 C 0.45145(18) 0.5531(5) 0.3618(4) 0.0311(13) Uani 1 1 d . . .
H13 H 0.4296 0.5026 0.3547 0.037 Uiso 1 1 calc R . .
C14 C 0.4923(2) 0.5192(6) 0.3742(5) 0.0418(16) Uani 1 1 d . . .
H14 H 0.4983 0.4449 0.3751 0.05 Uiso 1 1 calc R . .
C15 C 0.52423(19) 0.5922(6) 0.3852(5) 0.0411(17) Uani 1 1 d . . .
H15 H 0.5519 0.5679 0.3933 0.049 Uiso 1 1 calc R . .
C16 C 0.51605(19) 0.6997(7) 0.3843(5) 0.0465(18) Uani 1 1 d . . .
H16 H 0.5382 0.7493 0.393 0.056 Uiso 1 1 calc R . .
C17 C 0.47512(18) 0.7374(6) 0.3707(5) 0.0380(15) Uani 1 1 d . . .
H17 H 0.4694 0.8118 0.3689 0.046 Uiso 1 1 calc R . .
C18 C 0.37653(16) 0.6989(4) 0.4681(4) 0.0228(12) Uani 1 1 d . . .
C19 C 0.40222(19) 0.6524(5) 0.5470(4) 0.0349(15) Uani 1 1 d . . .
H19 H 0.4279 0.6234 0.5392 0.042 Uiso 1 1 calc R . .
C20 C 0.3908(2) 0.6476(5) 0.6384(5) 0.0396(15) Uani 1 1 d . . .
H20 H 0.4088 0.6153 0.693 0.048 Uiso 1 1 calc R . .
C21 C 0.3537(2) 0.6891(5) 0.6504(4) 0.0384(16) Uani 1 1 d . . .
H21 H 0.3457 0.6838 0.7127 0.046 Uiso 1 1 calc R . .
C22 C 0.32803(19) 0.7389(5) 0.5714(4) 0.0316(14) Uani 1 1 d . . .
H22 H 0.3028 0.77 0.5803 0.038 Uiso 1 1 calc R . .
C23 C 0.33895(18) 0.7433(5) 0.4800(4) 0.0272(12) Uani 1 1 d . . .
H23 H 0.3211 0.7763 0.4255 0.033 Uiso 1 1 calc R . .
C24 C 0.38760(18) 0.8451(5) 0.3117(5) 0.0372(16) Uani 1 1 d . . .
C25 C 0.3814(3) 0.8716(9) 0.2135(6) 0.081(3) Uani 1 1 d . . .
H25 H 0.3786 0.8187 0.1632 0.097 Uiso 1 1 calc R . .
C26 C 0.3793(3) 0.9880(12) 0.1897(9) 0.109(5) Uani 1 1 d . . .
H26 H 0.3736 1.0125 0.123 0.131 Uiso 1 1 calc R . .
C27 C 0.3859(4) 1.0575(12) 0.2667(15) 0.129(6) Uani 1 1 d . . .
H27 H 0.3854 1.1317 0.252 0.155 Uiso 1 1 calc R . .
C28 C 0.3927(3) 1.0293(8) 0.3586(12) 0.103(4) Uani 1 1 d . . .
H28 H 0.3974 1.0823 0.409 0.124 Uiso 1 1 calc R . .
C29 C 0.3931(3) 0.9252(6) 0.3835(7) 0.061(2) Uani 1 1 d . . .
H29 H 0.3973 0.9059 0.4515 0.074 Uiso 1 1 calc R . .
B B 0.3756(2) 0.3297(6) 0.4415(5) 0.0309(15) Uani 1 1 d . . .
F1 F 0.33945(16) 0.3042(6) 0.3873(4) 0.110(2) Uani 1 1 d . . .
F2 F 0.38107(18) 0.2953(10) 0.5309(4) 0.183(5) Uani 1 1 d . . .
F3 F 0.3751(2) 0.4369(6) 0.4543(9) 0.179(5) Uani 1 1 d . . .
F4 F 0.40904(14) 0.3102(4) 0.3995(3) 0.0754(15) Uani 1 1 d . . .
C101 C 0.498(2) 0.822(2) 0.642(2) 0.35(5) Uani 0.5 1 d PD . .
H10A H 0.5245 0.8005 0.6243 0.417 Uiso 0.5 1 calc PR . .
H10B H 0.4764 0.7806 0.598 0.417 Uiso 0.5 1 calc PR . .
Cl1 Cl 0.4910(4) 0.9424(13) 0.6038(12) 0.257(7) Uani 0.5 1 d PD . .
Cl2 Cl 0.5 0.7711(9) 0.75 0.298(6) Uani 1 2 d SD . .

loop_
     _atom_site_aniso_label
     _atom_site_aniso_U_11
     _atom_site_aniso_U_22
     _atom_site_aniso_U_33
     _atom_site_aniso_U_23
     _atom_site_aniso_U_13
     _atom_site_aniso_U_12
Ru 0.0208(3) 0.0242(3) 0.0159(2) -0.00056(18) 0.00350(17) 0.00055(19)
P 0.0214(7) 0.0282(8) 0.0199(7) -0.0019(6) 0.0047(6) 0.0033(6)
C1 0.025(3) 0.033(3) 0.036(3) -0.006(3) 0.000(3) -0.008(3)
C2 0.045(4) 0.022(3) 0.021(3) -0.001(2) 0.004(3) -0.004(3)
C3 0.036(3) 0.030(3) 0.017(3) -0.003(2) 0.007(2) 0.001(3)
C4 0.045(4) 0.023(3) 0.017(3) 0.002(2) 0.001(3) -0.006(3)
C5 0.032(3) 0.031(3) 0.023(3) -0.005(3) -0.009(2) 0.003(3)
C6 0.033(3) 0.025(3) 0.020(3) -0.004(2) 0.003(2) -0.006(2)
C7 0.026(3) 0.040(4) 0.022(3) -0.008(3) 0.003(2) 0.007(3)
C8 0.034(3) 0.050(4) 0.019(3) -0.007(3) 0.012(3) -0.007(3)
C9 0.031(3) 0.038(4) 0.014(3) -0.002(2) 0.001(2) 0.006(3)
C10 0.025(3) 0.031(3) 0.014(2) -0.007(2) 0.003(2) 0.002(2)
C11 0.026(3) 0.044(4) 0.028(3) -0.017(3) 0.002(3) -0.002(3)
C12 0.019(3) 0.035(3) 0.022(3) -0.006(2) 0.001(2) 0.004(2)
C13 0.031(3) 0.034(3) 0.028(3) -0.001(3) 0.006(3) 0.005(3)
C14 0.041(4) 0.051(4) 0.032(3) 0.002(3) 0.006(3) 0.018(3)
C15 0.025(3) 0.067(5) 0.031(3) 0.002(3) 0.005(3) 0.010(3)
C16 0.023(3) 0.063(5) 0.053(4) 0.002(4) 0.005(3) 0.000(3)
C17 0.023(3) 0.040(4) 0.050(4) 0.004(3) 0.003(3) 0.006(3)
C18 0.027(3) 0.023(3) 0.020(3) -0.002(2) 0.008(2) -0.001(2)
C19 0.036(3) 0.046(4) 0.026(3) 0.008(3) 0.012(3) 0.012(3)
C20 0.048(4) 0.040(4) 0.030(3) 0.007(3) 0.006(3) 0.002(3)
C21 0.057(4) 0.037(4) 0.025(3) -0.005(3) 0.015(3) -0.011(3)
C22 0.038(3) 0.034(3) 0.025(3) -0.011(3) 0.013(3) -0.007(3)
C23 0.031(3) 0.025(3) 0.025(3) -0.005(2) 0.005(2) 0.000(2)
C24 0.021(3) 0.042(4) 0.049(4) 0.024(3) 0.011(3) 0.002(3)
C25 0.061(5) 0.121(8) 0.050(5) 0.054(5) -0.016(4) -0.037(5)
C26 0.073(7) 0.142(12) 0.090(8) 0.087(8) -0.036(6) -0.047(8)
C27 0.063(7) 0.105(11) 0.205(17) 0.104(12) -0.010(9) 0.002(7)
C28 0.101(8) 0.036(5) 0.194(13) 0.030(7) 0.078(9) 0.016(5)
C29 0.072(6) 0.030(4) 0.098(7) 0.004(4) 0.055(5) 0.001(4)
B 0.030(4) 0.032(4) 0.029(3) 0.001(3) 0.001(3) -0.005(3)
F1 0.062(3) 0.206(7) 0.064(3) -0.048(4) 0.020(3) -0.060(4)
F2 0.062(4) 0.428(16) 0.058(3) 0.092(6) 0.012(3) 0.017(6)
F3 0.101(5) 0.072(5) 0.386(15) -0.005(7) 0.103(8) 0.009(4)
F4 0.062(3) 0.101(4) 0.073(3) -0.022(3) 0.037(3) -0.019(3)
C101 0.84(14) 0.066(19) 0.24(5) 0.07(2) 0.36(7) 0.07(4)
Cl1 0.170(10) 0.250(14) 0.302(16) -0.045(13) -0.069(10) -0.056(10)
Cl2 0.320(14) 0.189(10) 0.395(18) 0 0.097(13) 0


#----------------------------------------------------------------------------#
#                   MOLECULAR GEOMETRY                                       #
#----------------------------------------------------------------------------#

_geom_special_details
;
  All esds (except the esd in the dihedral angle between two l.s. planes)
  are estimated using the full covariance matrix.  The cell esds are taken
  into account individually in the estimation of esds in distances, angles
  and torsion angles; correlations between esds in cell parameters are only
  used when they are defined by crystal symmetry.  An approximate (isotropic)
  treatment of cell esds is used for estimating esds involving l.s. planes.
;
loop_
     _geom_bond_atom_site_label_1
     _geom_bond_atom_site_label_2
     _geom_bond_distance
     _geom_bond_site_symmetry_2
     _geom_bond_publ_flag
Ru C10 2.158(5) . ?
Ru C1 2.160(6) . ?
Ru C6 2.166(5) . ?
Ru C7 2.173(5) . ?
Ru C8 2.173(5) . ?
Ru C2 2.174(6) . ?
Ru C5 2.175(6) . ?
Ru C3 2.176(5) . ?
Ru C4 2.183(5) . ?
Ru C9 2.190(5) . ?
P C24 1.794(7) . ?
P C12 1.798(5) . ?
P C18 1.802(5) . ?
P C11 1.817(6) . ?
C1 C5 1.406(8) . ?
C1 C2 1.421(8) . ?
C2 C3 1.430(8) . ?
C3 C4 1.412(8) . ?
C4 C5 1.437(8) . ?
C6 C10 1.422(8) . ?
C6 C7 1.432(8) . ?
C7 C8 1.422(9) . ?
C8 C9 1.433(8) . ?
C9 C10 1.433(8) . ?
C10 C11 1.514(7) . ?
C12 C13 1.396(9) . ?
C12 C17 1.396(8) . ?
C13 C14 1.393(8) . ?
C14 C15 1.381(10) . ?
C15 C16 1.372(10) . ?
C16 C17 1.410(8) . ?
C18 C19 1.368(8) . ?
C18 C23 1.400(7) . ?
C19 C20 1.385(8) . ?
C20 C21 1.372(9) . ?
C21 C22 1.387(9) . ?
C22 C23 1.379(7) . ?
C24 C25 1.367(10) . ?
C24 C29 1.395(11) . ?
C25 C26 1.492(16) . ?
C26 C27 1.355(19) . ?
C27 C28 1.290(18) . ?
C28 C29 1.348(11) . ?
B F2 1.283(8) . ?
B F1 1.315(8) . ?
B F3 1.353(10) . ?
B F4 1.368(8) . ?
C101 Cl1 1.599(19) . ?
C101 Cl2 1.605(19) . ?
Cl2 C101 1.605(19) 2_656 ?

loop_
     _geom_angle_atom_site_label_1
     _geom_angle_atom_site_label_2
     _geom_angle_atom_site_label_3
     _geom_angle
     _geom_angle_site_symmetry_1
     _geom_angle_site_symmetry_3
     _geom_angle_publ_flag
C10 Ru C1 164.6(2) . . ?
C10 Ru C6 38.4(2) . . ?
C1 Ru C6 155.4(2) . . ?
C10 Ru C7 64.4(2) . . ?
C1 Ru C7 122.7(2) . . ?
C6 Ru C7 38.5(2) . . ?
C10 Ru C8 64.2(2) . . ?
C1 Ru C8 111.8(2) . . ?
C6 Ru C8 64.1(2) . . ?
C7 Ru C8 38.2(2) . . ?
C10 Ru C2 129.8(2) . . ?
C1 Ru C2 38.3(2) . . ?
C6 Ru C2 165.0(2) . . ?
C7 Ru C2 155.2(2) . . ?
C8 Ru C2 123.4(2) . . ?
C10 Ru C5 156.5(2) . . ?
C1 Ru C5 37.8(2) . . ?
C6 Ru C5 123.5(2) . . ?
C7 Ru C5 111.4(2) . . ?
C8 Ru C5 128.2(2) . . ?
C2 Ru C5 64.0(2) . . ?
C10 Ru C3 113.2(2) . . ?
C1 Ru C3 63.9(2) . . ?
C6 Ru C3 129.8(2) . . ?
C7 Ru C3 164.4(2) . . ?
C8 Ru C3 156.5(2) . . ?
C2 Ru C3 38.4(2) . . ?
C5 Ru C3 64.0(2) . . ?
C10 Ru C4 124.4(2) . . ?
C1 Ru C4 63.6(2) . . ?
C6 Ru C4 112.9(2) . . ?
C7 Ru C4 129.3(2) . . ?
C8 Ru C4 163.8(2) . . ?
C2 Ru C4 63.8(2) . . ?
C5 Ru C4 38.5(2) . . ?
C3 Ru C4 37.8(2) . . ?
C10 Ru C9 38.5(2) . . ?
C1 Ru C9 129.1(2) . . ?
C6 Ru C9 64.3(2) . . ?
C7 Ru C9 64.3(2) . . ?
C8 Ru C9 38.4(2) . . ?
C2 Ru C9 112.5(2) . . ?
C5 Ru C9 163.3(2) . . ?
C3 Ru C9 124.5(2) . . ?
C4 Ru C9 156.8(2) . . ?
C24 P C12 109.1(3) . . ?
C24 P C18 107.8(3) . . ?
C12 P C18 109.2(3) . . ?
C24 P C11 110.3(3) . . ?
C12 P C11 109.4(3) . . ?
C18 P C11 111.0(3) . . ?
C5 C1 C2 109.3(5) . . ?
C5 C1 Ru 71.7(3) . . ?
C2 C1 Ru 71.4(3) . . ?
C1 C2 C3 107.1(5) . . ?
C1 C2 Ru 70.3(3) . . ?
C3 C2 Ru 70.9(3) . . ?
C4 C3 C2 108.2(5) . . ?
C4 C3 Ru 71.4(3) . . ?
C2 C3 Ru 70.7(3) . . ?
C3 C4 C5 108.1(5) . . ?
C3 C4 Ru 70.8(3) . . ?
C5 C4 Ru 70.5(3) . . ?
C1 C5 C4 107.3(5) . . ?
C1 C5 Ru 70.5(3) . . ?
C4 C5 Ru 71.1(3) . . ?
C10 C6 C7 108.0(5) . . ?
C10 C6 Ru 70.5(3) . . ?
C7 C6 Ru 71.0(3) . . ?
C8 C7 C6 107.6(5) . . ?
C8 C7 Ru 70.9(3) . . ?
C6 C7 Ru 70.5(3) . . ?
C7 C8 C9 108.8(5) . . ?
C7 C8 Ru 70.9(3) . . ?
C9 C8 Ru 71.4(3) . . ?
C10 C9 C8 107.0(5) . . ?
C10 C9 Ru 69.6(3) . . ?
C8 C9 Ru 70.2(3) . . ?
C6 C10 C9 108.6(5) . . ?
C6 C10 C11 127.6(5) . . ?
C9 C10 C11 123.7(5) . . ?
C6 C10 Ru 71.1(3) . . ?
C9 C10 Ru 72.0(3) . . ?
C11 C10 Ru 126.4(3) . . ?
C10 C11 P 112.1(4) . . ?
C13 C12 C17 121.2(5) . . ?
C13 C12 P 119.3(4) . . ?
C17 C12 P 119.5(5) . . ?
C14 C13 C12 118.7(6) . . ?
C15 C14 C13 120.9(7) . . ?
C16 C15 C14 120.2(6) . . ?
C15 C16 C17 120.8(6) . . ?
C12 C17 C16 118.2(6) . . ?
C19 C18 C23 120.0(5) . . ?
C19 C18 P 121.0(4) . . ?
C23 C18 P 119.0(4) . . ?
C18 C19 C20 120.1(6) . . ?
C21 C20 C19 120.4(6) . . ?
C20 C21 C22 119.8(5) . . ?
C23 C22 C21 120.2(6) . . ?
C22 C23 C18 119.5(5) . . ?
C25 C24 C29 120.0(8) . . ?
C25 C24 P 120.3(7) . . ?
C29 C24 P 119.7(5) . . ?
C24 C25 C26 116.5(10) . . ?
C27 C26 C25 117.5(10) . . ?
C28 C27 C26 124.1(13) . . ?
C27 C28 C29 120.4(14) . . ?
C28 C29 C24 121.4(10) . . ?
F2 B F1 113.5(7) . . ?
F2 B F3 102.2(9) . . ?
F1 B F3 106.3(7) . . ?
F2 B F4 112.1(7) . . ?
F1 B F4 115.9(6) . . ?
F3 B F4 105.3(6) . . ?
Cl1 C101 Cl2 131(2) . . ?
C101 Cl2 C101 133(3) 2_656 . ?

#===END
